# Supplementary material for: Molecular salts of quinine: a crystal engineering route to enhance the aqueous solubility
Source: Royal Society of Chemistry journal article supplement (doi:10.1039/d1ce00791b), 2021-01-01
Supplement: d1ce00791b1.pdf [file d1ce00791b1.pdf]

# **Molecular salts of quinine. A crystal engineering route to enhance the aqueous solubility**

Indira S. Divya, Surendran Amrutha, Sunil SeethaLekshmi\* and Sunil Varughese\*

**Supporting Information**

## EXPERIMENTAL SECTION

**Preparation method:** Good quality crystals suitable for single-crystal XRD were obtained by slow evaporation of neat ground samples from various solvents. QUN-OXA was obtained from EtOH, that of QUN-ADI from 2:1 EtOH-H<sub>2</sub>O solution, QUN-HBA from 2:1 MeOH-H<sub>2</sub>O solution, QUN-SLA from EtOH, QUN-26DHB from 1:1 THF-Hexane solution, and QUN-TFA from 1:1 EtOH-H<sub>2</sub>O solution. The crystals of QUN-FMA was obtained by vapor diffusion from MeOH-DEE.

The neat ground powder showed a partial melting at 124 °C which solidified and completely melted at 196-203 °C. QN-SAC crystal obtained from 2:1 THF/Hexane solution on HSM experiment showed a melting at a temperature range of 198-206 °C. The powder sample from slurry experiment conducted on 1:1 CHCl<sub>3</sub>/MeOH solution (to obtain salt based on literature) also showed a melting at 198-204 °C. The plate like crystal obtained by slow evaporation from 1:1 CHCl<sub>3</sub>/MeOH using the above mentioned powder as seed on heating showed a desolvation like episode at 90 °C. Some block like crystals grew from it which finally melted at 185 °C (MP of QN-SAC salt is 185.9 °C).

**Single crystal X-ray Diffraction:** The diffraction data of single crystals were collected on a Rigaku Saturn 724+ diffractometer using graphite monochromated Mo-K $\alpha$  radiation. In these cases, data were processed with the Rigaku CrystalClear software. The structure solution was carried out by direct methods, and the refinements were performed by full-matrix least-squares on *F*<sup>2</sup> using the SHELXTL suite of programs. All calculations of intermolecular interactions were done with the HBOND NORM option of PLATON. A misassigned or additional symmetry check by the PLATON program confirms that each of the dimorphs is unique, and more convincingly, the packing and the conformational preferences of the molecules in the two structures are different.

**Powder X-ray Diffraction (PXRD):** PXRD patterns of the complexes were recorded at room temperature (25.0  $\pm$  2.0 °C) on Philips X'pert Pro with Cu K $\alpha$  radiation (1.54 Å), at 30 mA, 45 kV. The analysis was performed in a continuous mode with a step size of 0.03 ° and a step time of 10 s over an angular range of 5-35 ° 2 $\theta$ .

**Optical and Hot-Stage Microscope (HSM).** Phase transition studies were performed on a Leica DM 2500 P optical transmission microscope. The apparatus was equipped with a wide zoom camera and Mettler Toledo hot-stage. The powdered samples were placed on a micro slide, inserted in the hot stage, and observed under the microscope. Images were recorded on heating and cooling in the same temperature regions where phase transitions were observed in DSC. The heating-cooling rate was 5°C/min.

**Thermogravimetric analysis:** The stability and desolvation behavior of the samples were analyzed using thermogravimetry (HITACHI STA7300). About 5 mg of each sample was accurately weighed in ceramic pans and subjected to the thermal scan from room temperature to 300°C at a rate of 5°C/min in an argon atmosphere.

**Dissolution studies:** QUN and its complexes showed punch sticking property i.e. powder adhesion during pellet preparation. To overcome this, we used Microcrystalline cellulose (MCC) (20% w/W) along with a standard weight of 300mg of each powder sample. Individual tablets were suspended in 10ml of distilled water and stirred for 24hrs in a shaker at 100 rpm to ensure complete drug release. 1ml of the sample was withdrawn periodically and an equal amount of pure distilled water was added to it. The solution was suitably diluted and measured the absorbance value using the Shimadzu UV-1800 spectrophotometer. The spectra were recorded at a range of 200 to 800nm in a 1ml cuvette. Initially, a standard solution of QUN was prepared in the dissolution media. By appropriate dissolution of the stock solution, the calibration curve of QUN was plotted to obtain the molar absorptivity. Then the solubility of QUN and complexes were determined using the BEER-LAMBERT LAW  $A = \epsilon CL$  where A = Absorbance  $\epsilon$  = Molar attenuation coefficient C = Concentration L= Optical Path length.

**Table S1.** Crystallographic Information

|                                                      | <b>QUN:OXA</b>                                                                                                       | <b>QUN:FUM</b>                                                                                                                          | <b>QUN:MAL</b>                                                                                                       | <b>QUN:GLT</b>                                                                                                       | <b>QUN:ADA</b>                                                                                                        |
|------------------------------------------------------|----------------------------------------------------------------------------------------------------------------------|-----------------------------------------------------------------------------------------------------------------------------------------|----------------------------------------------------------------------------------------------------------------------|----------------------------------------------------------------------------------------------------------------------|-----------------------------------------------------------------------------------------------------------------------|
| Formula                                              | (C <sub>20</sub> H <sub>24</sub> N <sub>2</sub> O <sub>2</sub> ):<br>(C <sub>2</sub> H <sub>2</sub> O <sub>4</sub> ) | (C <sub>20</sub> H <sub>24</sub> N <sub>2</sub> O <sub>2</sub> ):<br>(C <sub>4</sub> H <sub>4</sub> O <sub>4</sub> ):(H <sub>2</sub> O) | (C <sub>20</sub> H <sub>24</sub> N <sub>2</sub> O <sub>2</sub> ):<br>(C <sub>3</sub> H <sub>4</sub> O <sub>4</sub> ) | (C <sub>20</sub> H <sub>24</sub> N <sub>2</sub> O <sub>2</sub> ):<br>(C <sub>5</sub> H <sub>8</sub> O <sub>4</sub> ) | (C <sub>20</sub> H <sub>24</sub> N <sub>2</sub> O <sub>2</sub> ):<br>(C <sub>6</sub> H <sub>10</sub> O <sub>4</sub> ) |
| CCDC Nos.                                            | 2036856                                                                                                              | 2036857                                                                                                                                 | 2036853                                                                                                              | 2036851                                                                                                              | 2036854                                                                                                               |
| Formula Wt.                                          | 417.43                                                                                                               | 935.01                                                                                                                                  | 428.47                                                                                                               | 472.52                                                                                                               | 445.48                                                                                                                |
| Crystal habit                                        | Block                                                                                                                | Block                                                                                                                                   | Block                                                                                                                | Needle                                                                                                               | Needle                                                                                                                |
| Crystal colour                                       | colourless                                                                                                           | colourless                                                                                                                              | colourless                                                                                                           | colourless                                                                                                           | colourless                                                                                                            |
| Crystal system                                       | Monoclinic                                                                                                           | Triclinic                                                                                                                               | Orthorhombic                                                                                                         | Monoclinic                                                                                                           | Monoclinic                                                                                                            |
| Space group                                          | <i>C</i> 2                                                                                                           | <i>P</i> 1                                                                                                                              | <i>P</i> 2 <sub>1</sub> 2 <sub>1</sub> 1                                                                             | <i>I</i> 2                                                                                                           | <i>C</i> 2                                                                                                            |
| <i>a</i> (Å)                                         | 21.387(10)                                                                                                           | 6.5187(3)                                                                                                                               | 6.6594(3)                                                                                                            | 20.206(7)                                                                                                            | 19.945(10)                                                                                                            |
| <i>b</i> (Å)                                         | 6.419(3)                                                                                                             | 10.9299(6)                                                                                                                              | 11.8450(5)                                                                                                           | 6.6378(19)                                                                                                           | 6.698(4)                                                                                                              |
| <i>c</i> (Å)                                         | 18.467(8)                                                                                                            | 17.6311(9)                                                                                                                              | 26.3450(13)                                                                                                          | 20.461(5)                                                                                                            | 18.303(10)                                                                                                            |
| $\alpha$ (°)                                         | 90                                                                                                                   | 99.531(2)                                                                                                                               | 90                                                                                                                   | 90                                                                                                                   | 90                                                                                                                    |
| $\beta$ (°)                                          | 121.541(7)                                                                                                           | 97.444(2)                                                                                                                               | 90                                                                                                                   | 116.74(2)                                                                                                            | 94.980(9)                                                                                                             |
| $\gamma$ (°)                                         | 90                                                                                                                   | 106.711(2)                                                                                                                              | 90                                                                                                                   | 90                                                                                                                   | 90                                                                                                                    |
| <i>V</i> (Å <sup>3</sup> )                           | 2160.8(17)                                                                                                           | 1165.47(10)                                                                                                                             | 2078.11(16)                                                                                                          | 2450.8(13)                                                                                                           | 2436(2)                                                                                                               |
| <i>Z</i>                                             | 4                                                                                                                    | 1                                                                                                                                       | 4                                                                                                                    | 4                                                                                                                    | 4                                                                                                                     |
| <i>D</i> <sub>calc</sub> (g cm <sup>-3</sup> )       | 1.283                                                                                                                | 1.332                                                                                                                                   | 1.370                                                                                                                | 1.281                                                                                                                | 1.215                                                                                                                 |
| <i>T</i> (K)                                         | 298                                                                                                                  | 100(2)                                                                                                                                  | 150(2)                                                                                                               | 298                                                                                                                  | 298                                                                                                                   |
| ( $\lambda$ )Mo K $\alpha$                           | 0.71073                                                                                                              | 0.71073                                                                                                                                 | 0.71073                                                                                                              | 0.71073                                                                                                              | 0.71073                                                                                                               |
| $\mu$ (mm <sup>-1</sup> )                            | 0.097                                                                                                                | 0.099                                                                                                                                   | 0.099                                                                                                                | 0.094                                                                                                                | 0.090                                                                                                                 |
| 2 $\theta$ range (°)                                 | 54.8                                                                                                                 | 50.4                                                                                                                                    | 51.0                                                                                                                 | 55                                                                                                                   | 54.8                                                                                                                  |
| Total Reflns.                                        | 8062                                                                                                                 | 24732                                                                                                                                   | 17111                                                                                                                | 11284                                                                                                                | 9227                                                                                                                  |
| Unique Reflns.                                       | 3738                                                                                                                 | 8372                                                                                                                                    | 3641                                                                                                                 | 5419                                                                                                                 | 4214                                                                                                                  |
| Reflns. Used                                         | 2277                                                                                                                 | 7393                                                                                                                                    | 3468                                                                                                                 | 3726                                                                                                                 | 2566                                                                                                                  |
| No. Parameters                                       | 260                                                                                                                  | 667                                                                                                                                     | 301                                                                                                                  | 304                                                                                                                  | 292                                                                                                                   |
| GOF on <i>F</i> <sup>2</sup>                         | 0.950                                                                                                                | 1.050                                                                                                                                   | 1.095                                                                                                                | 1.003                                                                                                                | 0.945                                                                                                                 |
| Final <i>R</i> <sub>1</sub> , <i>wR</i> <sub>2</sub> | 0.0728, 0.1904                                                                                                       | 0.0444, 0.1041                                                                                                                          | 0.0461, 0.1224                                                                                                       | 0.0708, 0.1952                                                                                                       | 0.0832, 0.2455                                                                                                        |

**Table S1.** Crystallographic Information (Cont.)

|                                                      | <b>QUN:SAL</b>                                                                                                                          | <b>QUN:DHB</b>                                                                                                       | <b>QUN:HBA<sub>m</sub></b>                                                                                                               | <b>QUN:TFA</b>                                                                                                                               | <b>QUN:SAC<sub>h</sub></b>                                                                                                                                                                    |
|------------------------------------------------------|-----------------------------------------------------------------------------------------------------------------------------------------|----------------------------------------------------------------------------------------------------------------------|------------------------------------------------------------------------------------------------------------------------------------------|----------------------------------------------------------------------------------------------------------------------------------------------|-----------------------------------------------------------------------------------------------------------------------------------------------------------------------------------------------|
| Formula                                              | (C <sub>20</sub> H <sub>24</sub> N <sub>2</sub> O <sub>2</sub> ):<br>(C <sub>7</sub> H <sub>6</sub> O <sub>3</sub> ):(H <sub>2</sub> O) | (C <sub>20</sub> H <sub>24</sub> N <sub>2</sub> O <sub>2</sub> ):<br>(C <sub>7</sub> H <sub>6</sub> O <sub>4</sub> ) | (C <sub>20</sub> H <sub>24</sub> N <sub>2</sub> O <sub>2</sub> ):<br>(C <sub>7</sub> H <sub>6</sub> O <sub>3</sub> ):(CH <sub>4</sub> O) | (C <sub>20</sub> H <sub>24</sub> N <sub>2</sub> O <sub>2</sub> ):<br>(C <sub>2</sub> HF <sub>3</sub> O <sub>2</sub> ):<br>(H <sub>2</sub> O) | (C <sub>20</sub> H <sub>24</sub> N <sub>2</sub> O <sub>2</sub> ):<br>(C <sub>7</sub> H <sub>5</sub> N <sub>3</sub> O <sub>3</sub> S):<br>(H <sub>2</sub> O):(C <sub>4</sub> H <sub>8</sub> O) |
| CCDC Nos.                                            | 2036859                                                                                                                                 | 2036852                                                                                                              | 2036855                                                                                                                                  | 2036858                                                                                                                                      | 2036860                                                                                                                                                                                       |
| Formula Wt.                                          | 480.54                                                                                                                                  | 478.53                                                                                                               | 494.57                                                                                                                                   | 570.48                                                                                                                                       | 1151.28                                                                                                                                                                                       |
| Crystal habit                                        | Block                                                                                                                                   | Block                                                                                                                | Block                                                                                                                                    | Block                                                                                                                                        | Block                                                                                                                                                                                         |
| Crystal colour                                       | colourless                                                                                                                              | colourless                                                                                                           | colourless                                                                                                                               | colourless                                                                                                                                   | colourless                                                                                                                                                                                    |
| Crystal system                                       | Orthorhombic                                                                                                                            | Orthorhombic                                                                                                         | Orthorhombic                                                                                                                             | Orthorhombic                                                                                                                                 | Orthorhombic                                                                                                                                                                                  |
| Space group                                          | <i>P</i> 2 <sub>1</sub> 2 <sub>1</sub> 2 <sub>1</sub>                                                                                   | <i>P</i> 2 <sub>1</sub> 2 <sub>1</sub> 2 <sub>1</sub>                                                                | <i>P</i> 2 <sub>1</sub> 2 <sub>1</sub> 2 <sub>1</sub>                                                                                    | <i>P</i> 2 <sub>1</sub> 2 <sub>1</sub> 2 <sub>1</sub>                                                                                        | <i>P</i> 2 <sub>1</sub> 2 <sub>1</sub> 2 <sub>1</sub>                                                                                                                                         |
| <i>a</i> (Å)                                         | 6.943(3)                                                                                                                                | 8.978(4)                                                                                                             | 6.5291(19)                                                                                                                               | 6.722(2)                                                                                                                                     | 15.5984(5)                                                                                                                                                                                    |
| <i>b</i> (Å)                                         | 17.066(6)                                                                                                                               | 9.713(5)                                                                                                             | 19.368(6)                                                                                                                                | 19.671(6)                                                                                                                                    | 15.7897(5)                                                                                                                                                                                    |
| <i>c</i> (Å)                                         | 20.466(8)                                                                                                                               | 28.903(14)                                                                                                           | 20.431(6)                                                                                                                                | 20.290(6)                                                                                                                                    | 23.5416(7)                                                                                                                                                                                    |
| $\alpha$ (°)                                         | 90                                                                                                                                      | 90                                                                                                                   | 90                                                                                                                                       | 90                                                                                                                                           | 90                                                                                                                                                                                            |
| $\beta$ (°)                                          | 90                                                                                                                                      | 90                                                                                                                   | 90                                                                                                                                       | 90                                                                                                                                           | 90                                                                                                                                                                                            |
| $\gamma$ (°)                                         | 90                                                                                                                                      | 90                                                                                                                   | 90                                                                                                                                       | 90                                                                                                                                           | 90                                                                                                                                                                                            |
| <i>V</i> (Å <sup>3</sup> )                           | 2424.9(16)                                                                                                                              | 2520(2)                                                                                                              | 2583.6(13)                                                                                                                               | 2683.1(14)                                                                                                                                   | 5798.2(3)                                                                                                                                                                                     |
| <i>Z</i>                                             | 4                                                                                                                                       | 4                                                                                                                    | 4                                                                                                                                        | 4                                                                                                                                            | 4                                                                                                                                                                                             |
| <i>D</i> <sub>calc</sub> (g cm <sup>-3</sup> )       | 1.316                                                                                                                                   | 1.261                                                                                                                | 1.271                                                                                                                                    | 1.412                                                                                                                                        | 1.319                                                                                                                                                                                         |
| <i>T</i> (K)                                         | 298(2)                                                                                                                                  | 298(2)                                                                                                               | 150(2)                                                                                                                                   | 298(2)                                                                                                                                       | 150(2)                                                                                                                                                                                        |
| ( $\lambda$ )Mo K $\alpha$                           | 0.71073                                                                                                                                 | 0.71073                                                                                                              | 0.71073                                                                                                                                  | 0.71073                                                                                                                                      | 0.71073                                                                                                                                                                                       |
| $\mu$ (mm <sup>-1</sup> )                            | 0.093                                                                                                                                   | 0.089                                                                                                                | 0.089                                                                                                                                    | 0.130                                                                                                                                        | 0.164                                                                                                                                                                                         |
| 2 $\theta$ range (°)                                 | 55                                                                                                                                      | 55                                                                                                                   | 55                                                                                                                                       | 55                                                                                                                                           | 55                                                                                                                                                                                            |
| Total Reflns.                                        | 21414                                                                                                                                   | 18342                                                                                                                | 18359                                                                                                                                    | 23898                                                                                                                                        | 69164                                                                                                                                                                                         |
| Unique Reflns.                                       | 5525                                                                                                                                    | 4541                                                                                                                 | 4623                                                                                                                                     | 6082                                                                                                                                         | 17621                                                                                                                                                                                         |
| Reflns. Used                                         | 3253                                                                                                                                    | 1891                                                                                                                 | 2582                                                                                                                                     | 3343                                                                                                                                         | 16878                                                                                                                                                                                         |
| No. Parameters                                       | 336                                                                                                                                     | 329                                                                                                                  | 350                                                                                                                                      | 373                                                                                                                                          | 737                                                                                                                                                                                           |
| GOF on <i>F</i> <sup>2</sup>                         | 0.831                                                                                                                                   | 0.766                                                                                                                | 0.825                                                                                                                                    | 0.907                                                                                                                                        | 1.035                                                                                                                                                                                         |
| Final <i>R</i> <sub>1</sub> , <i>wR</i> <sub>2</sub> | 0.0438, 0.0942                                                                                                                          | 0.0495, 0.1102                                                                                                       | 0.0510, 0.0982                                                                                                                           | 0.0591, 0.1813                                                                                                                               | 0.0447, 0.1203                                                                                                                                                                                |

**Scheme S1. Molecules of Interest**

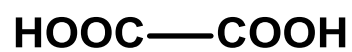

**Oxalic acid (OXA)**

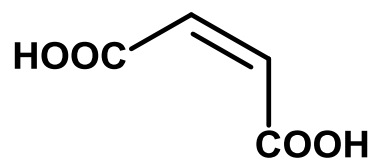

**Maleic acid (MA)**

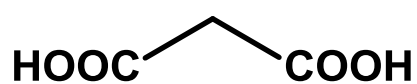

**Malonic acid (MAL)**

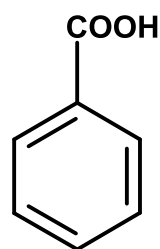

**Benzoic acid (BZA)**

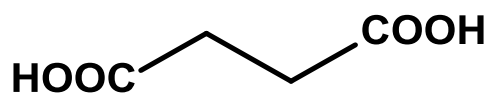

**Succinic acid (SUC)**

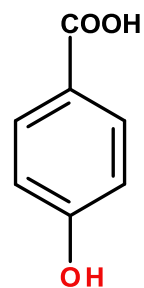

**4-Hydroxybenzoic acid (HBA)**

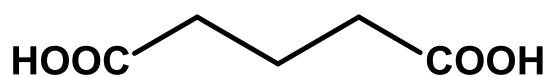

**Glutaric acid (GLT)**

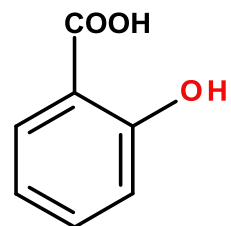

**Salicylic acid (SAL)**

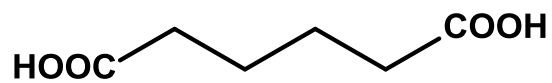

**Adipic acid (ADA)**

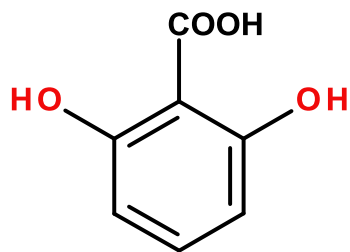

**2,6-Dihydroxybenzoic acid (DHB)**

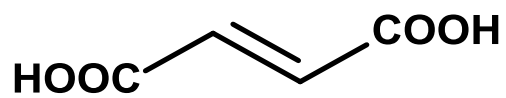

**Fumaric acid (FUM)**

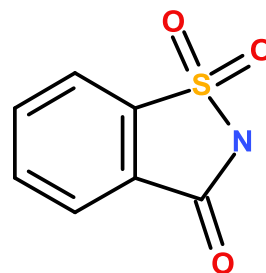

**Saccharin (SAC)**

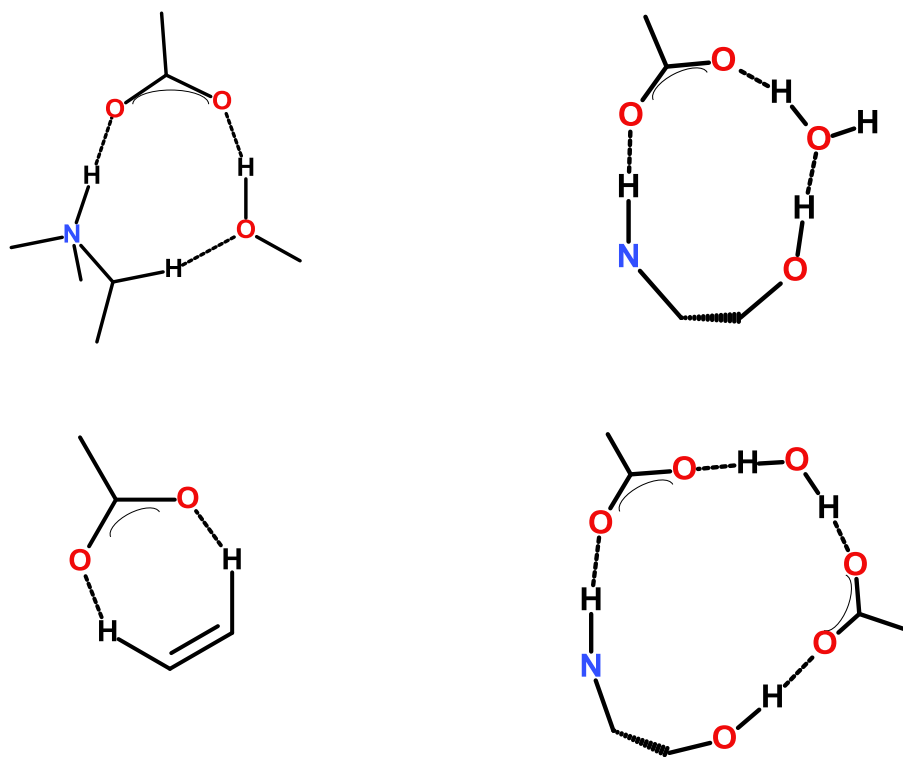

**Scheme S2.** Types of major synthons observed in the complexes of QUN



**Table S2.** Computed  $\Delta pK_a$  values

| Complex | $\Delta pK_a$ |
|---------|---------------|
| QUN     | —             |
| QUN:OXA | 7.38          |
| QUN:MAL | 6.32          |
| QUN:SUC | 5.19          |
| QUN:GLT | 4.99          |
| QUN:ADA | 4.83          |
| QUN:FUM | 5.40          |
| QUN:MAE | 5.90          |
| QUN:BZA | 4.97          |
| QUN:HBA | 4.67          |
| QUN:SAL | 6.26          |
| QUN:DHB | 7.41          |
| QUN:SAC | 6.21          |
|         | 1.66          |
| QUN:TFA | 8.10          |
|         | 3.55          |

**Table S3.** Measured melting points of the complexes

| SL NO | DRUG/COFORMERS | TEMP (° C) | COMPLEXES | TEMP (°C) |
|-------|----------------|------------|-----------|-----------|
| 1     | QN             | 177        |           |           |
| 2     | OXA            | 189        | QUN:OXA   | 168-176   |
| 3     | FUM            | 299        | QUN:FUM   | 206-210   |
| 4     | MAL            | 135        | QUN:MAL   | 181-186   |
| 5     | SUC            | 184        | QUN:SUC   | 163-170   |
| 6     | GLT            | 97         | QUN:GLT   | 113-120   |
| 7     | ADA            | 152        | QUN:ADA   | 130-138   |
| 8     | MAE            | 130        | QUN:MAE   | 191-199   |
| 9     | BZA            | 122        | QUN:BZA   | 173-179   |
| 10    | HBA            | 214        | QUN:HBA   | 190-196   |
| 11    | SAL            | 158        | QUN:SAL   | 118-196   |
| 12    | DHB            | 343        | QUN:DHB   | 215-220   |
| 13    | SAC            | 228        | QUN:SAC   | 198-204   |

## PXRD Results

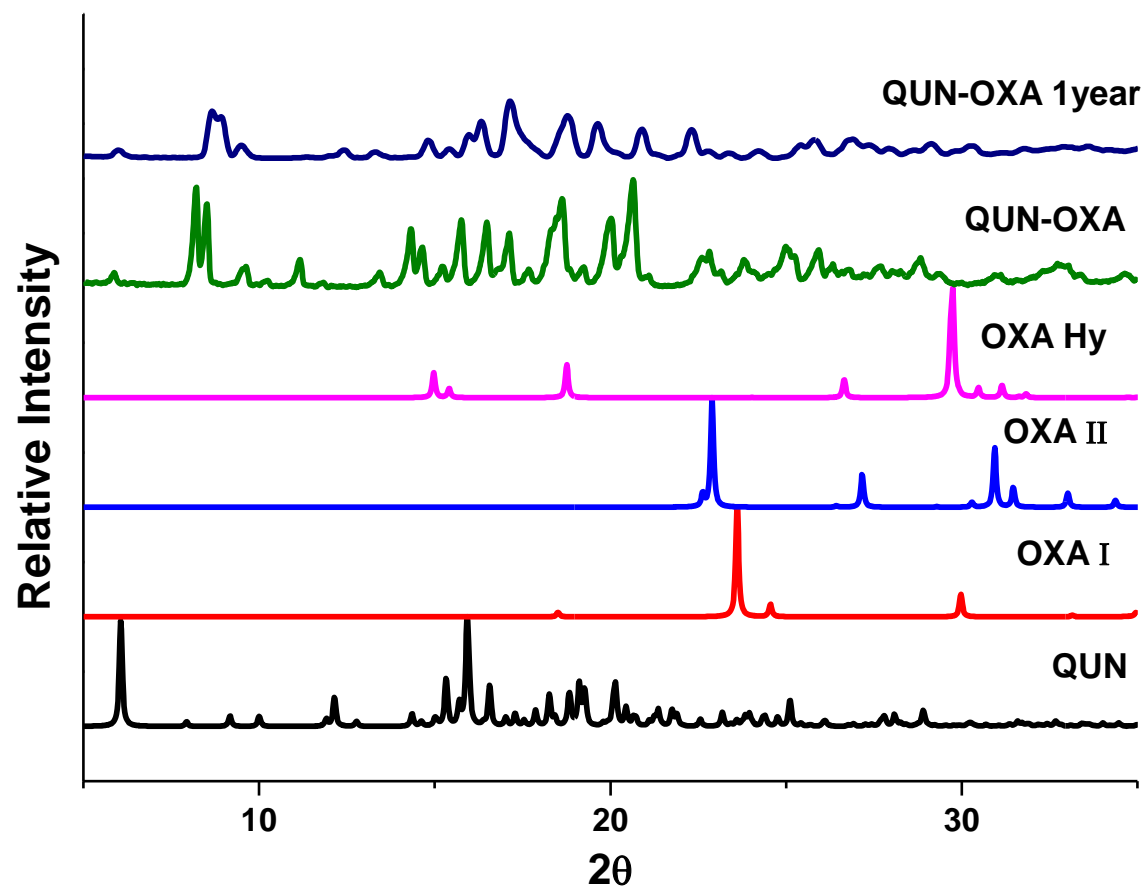

Fig. S1. PXRD pattern of the QUN:OXA complex

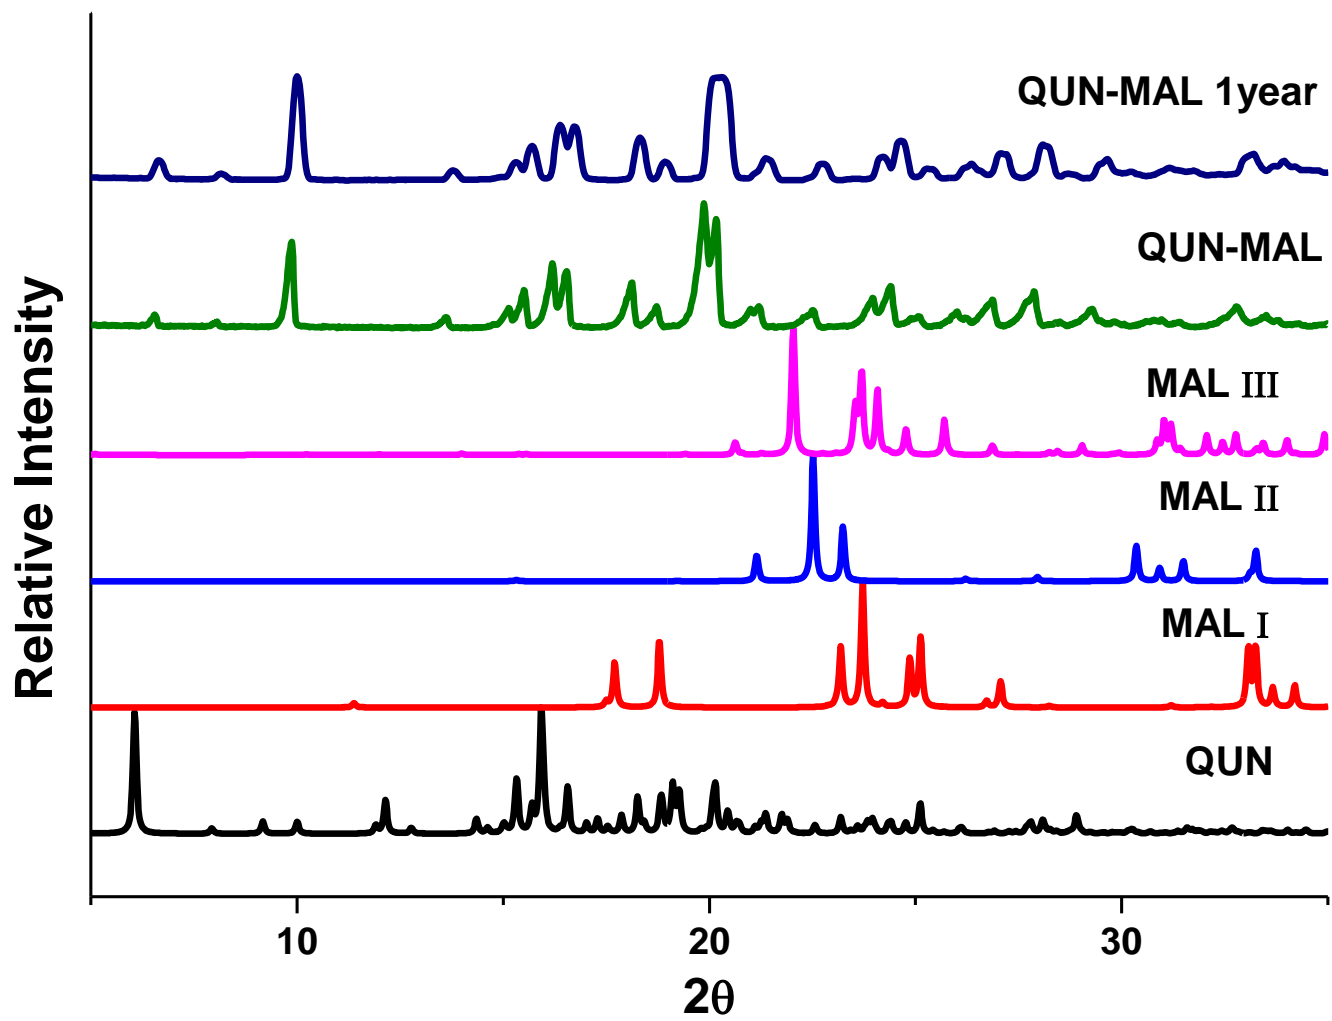

Fig. S2. PXRD pattern of the QUN:MAL complex

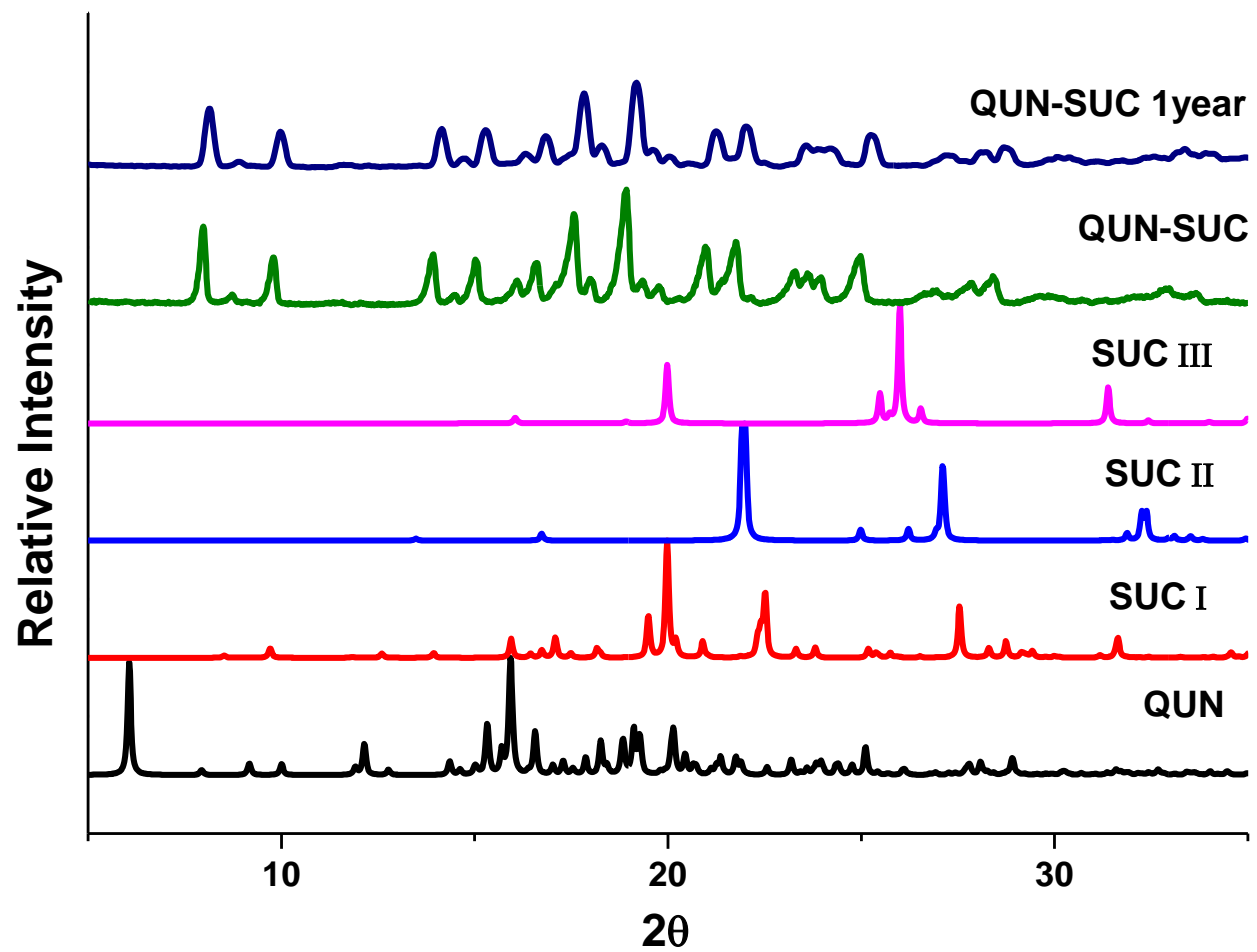

**Fig. S3.** PXRD pattern of the QUN:SUC complex

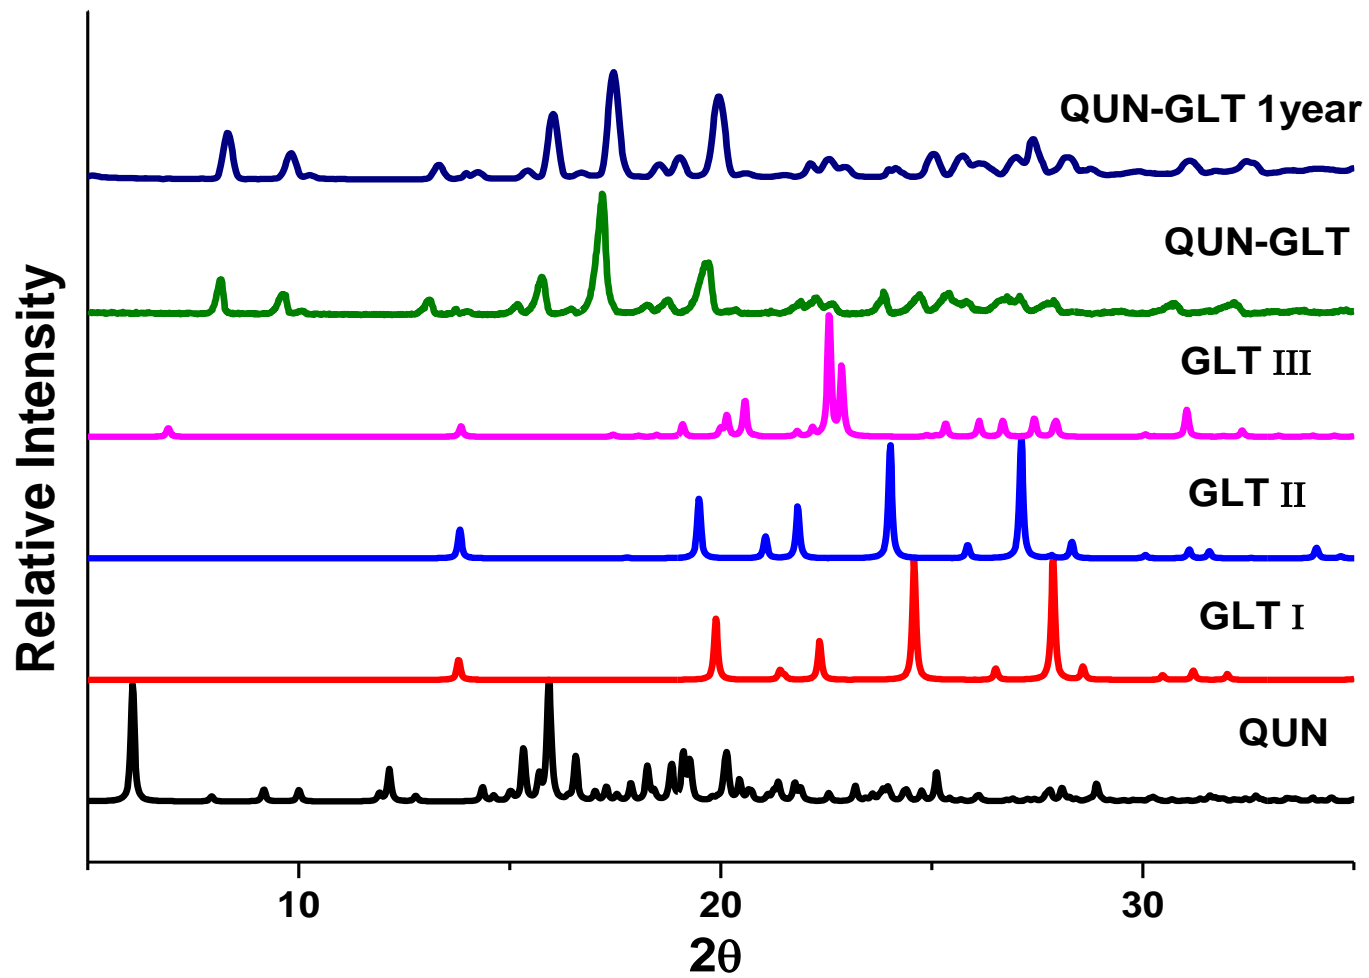

Fig. S4. PXRD pattern of the QUN:GLT complex

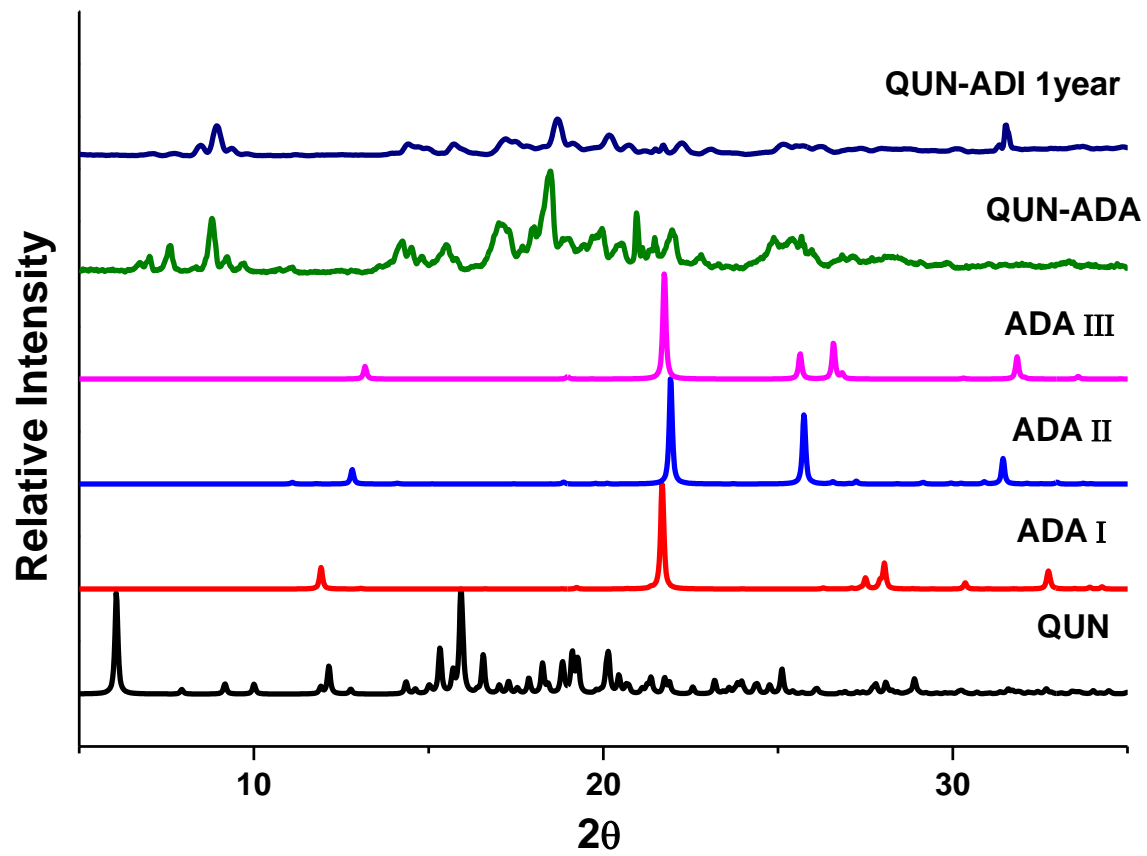

Fig. S5. PXRD pattern of the QUN:ADA complex

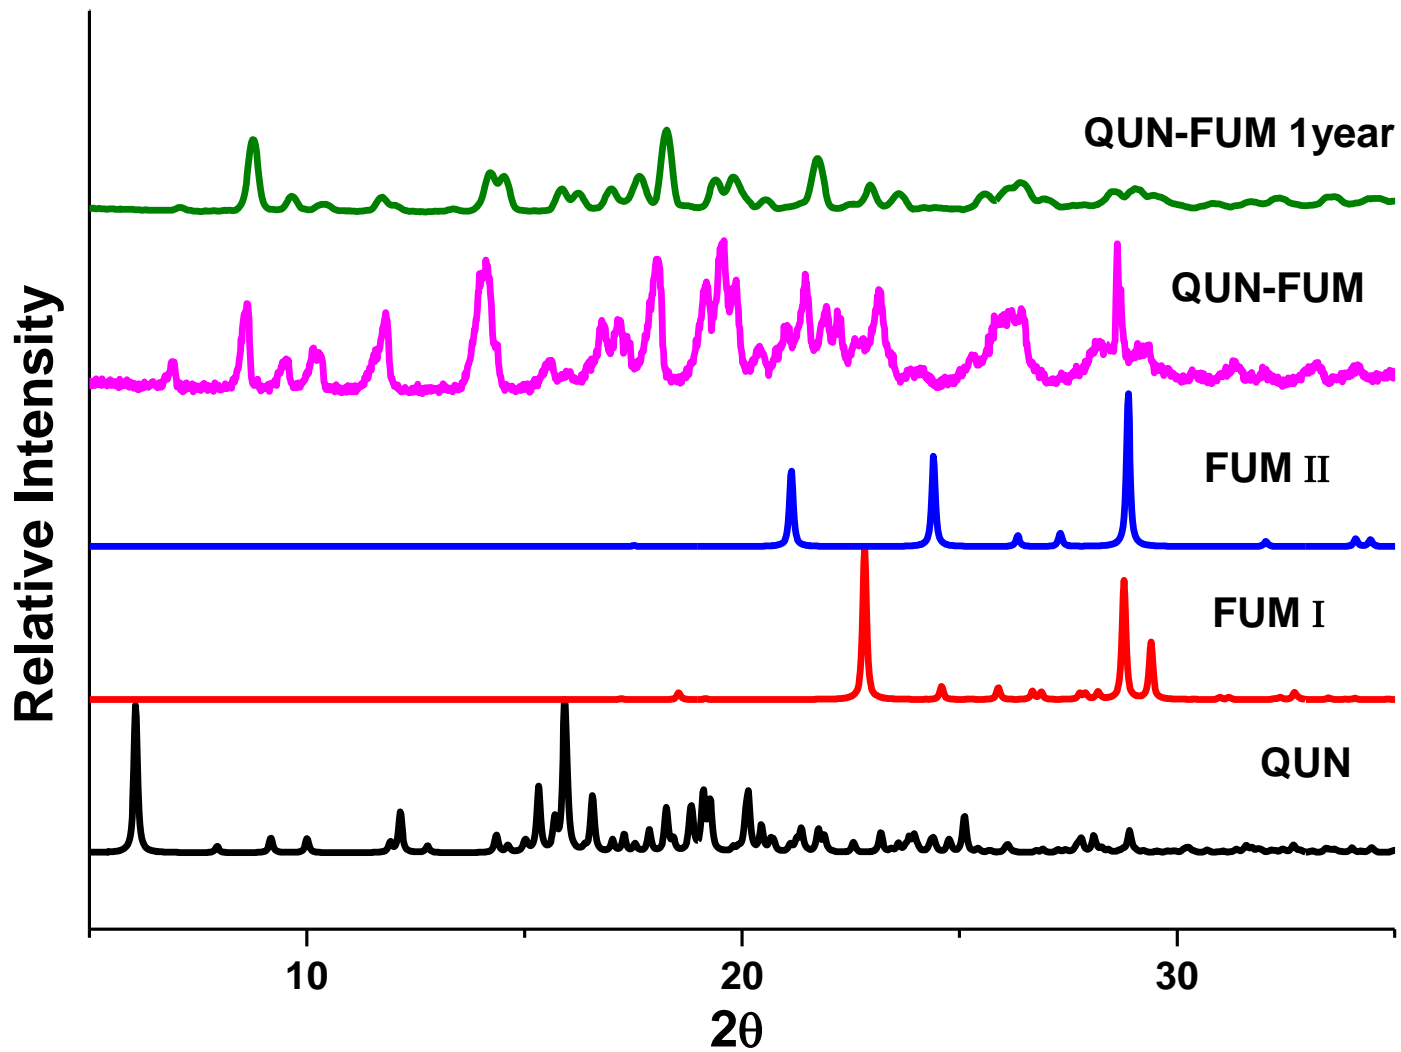

Fig. S6. PXRD pattern of the QUN:FUM complex

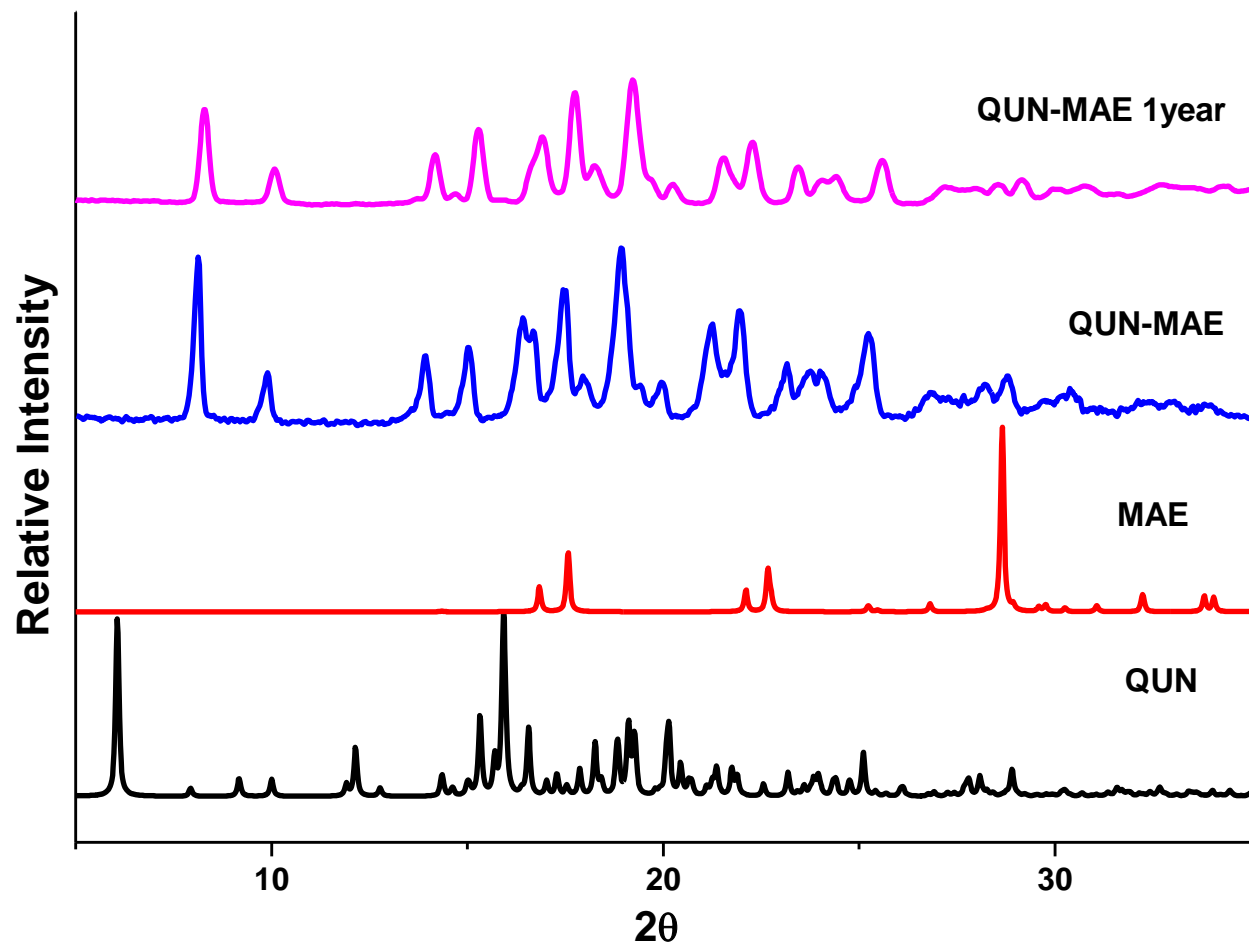

**Fig. S7.** PXRD pattern of the QUN:MAE complex



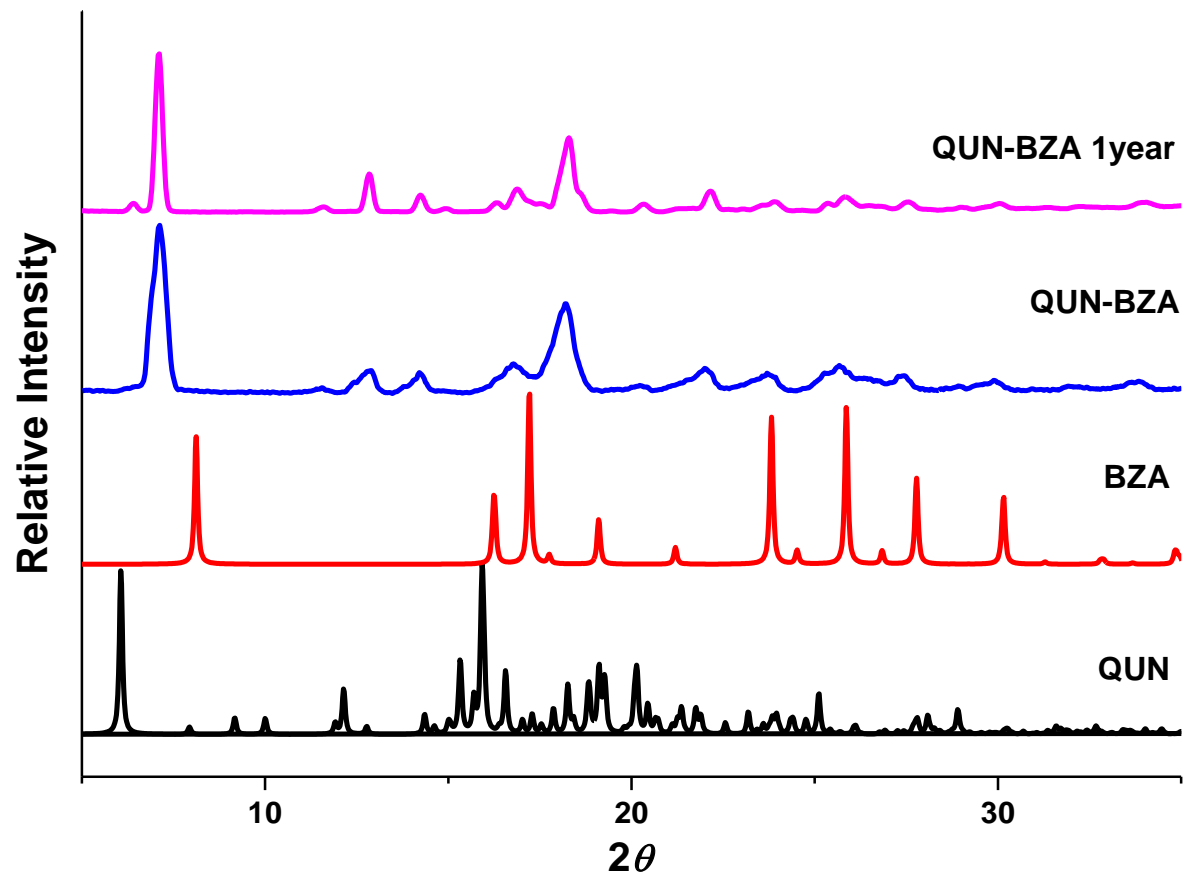

Fig. S8. PXRD pattern of the QUN:BZA complex

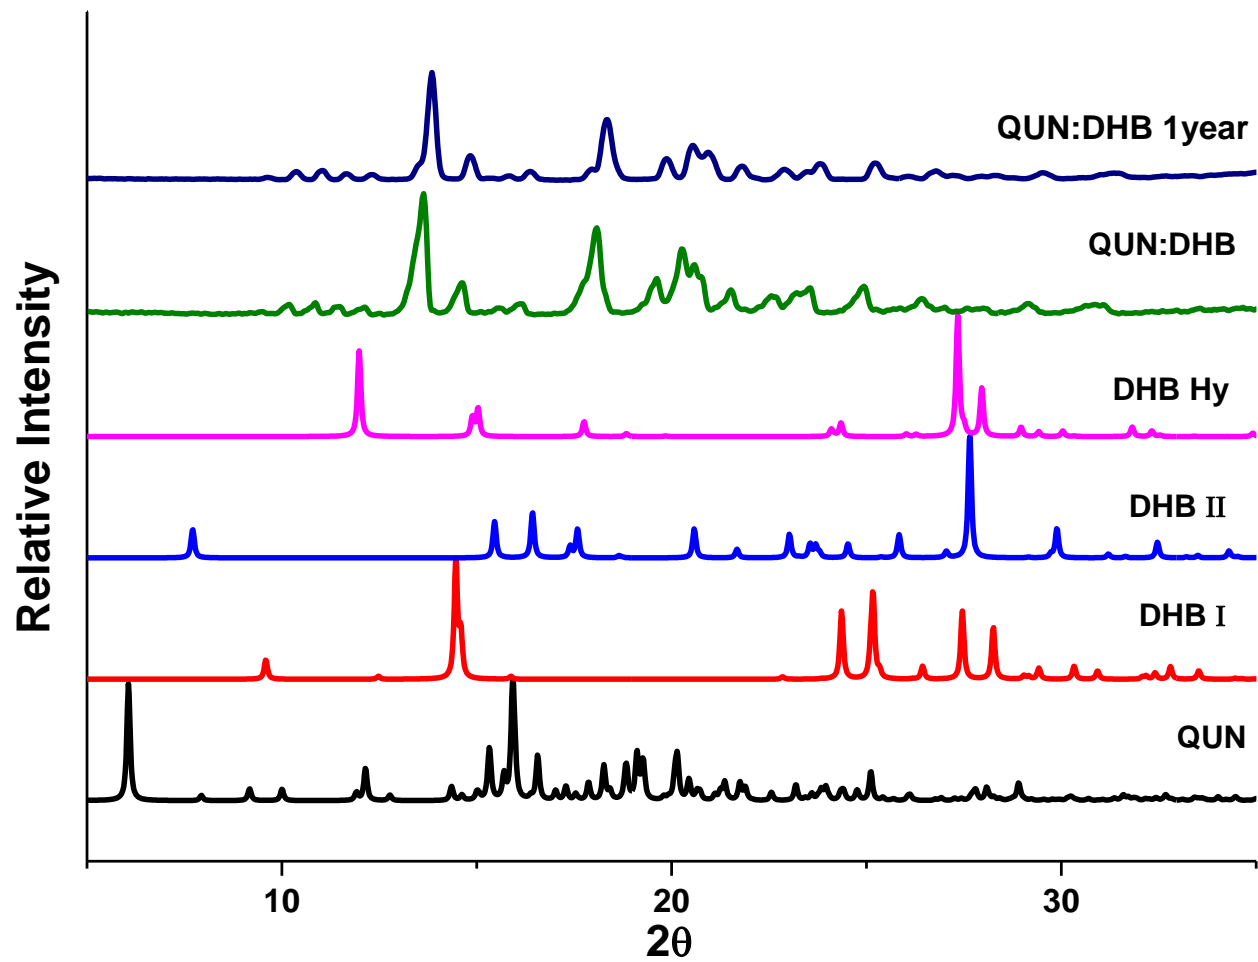

Fig. S9. PXRD pattern of the QUN:DHB complex

## Hot-Stage Microscopy

### QN-SAC Crystal

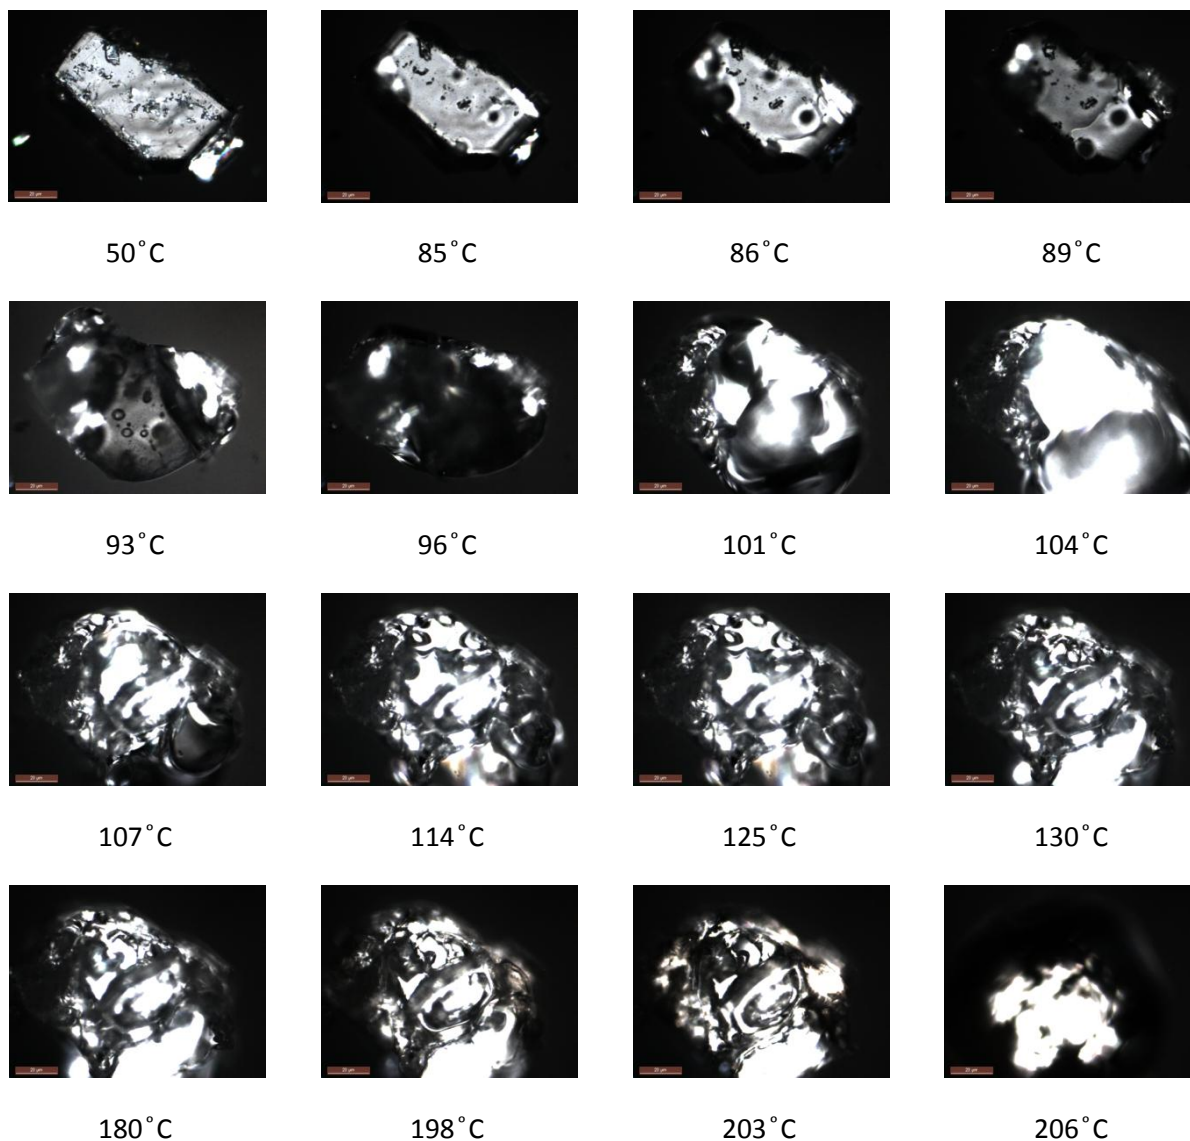

**Fig. S10.** The QN-SAC crystal obtained by slow evaporation from 2:1 THF-Hexane solution using melted sample as seed shows a melting at a temperature range of 85-104 °C. It then solidifies at 125 °C which finally melts at 198-206 °C.

## Thermal Analysis

(a)

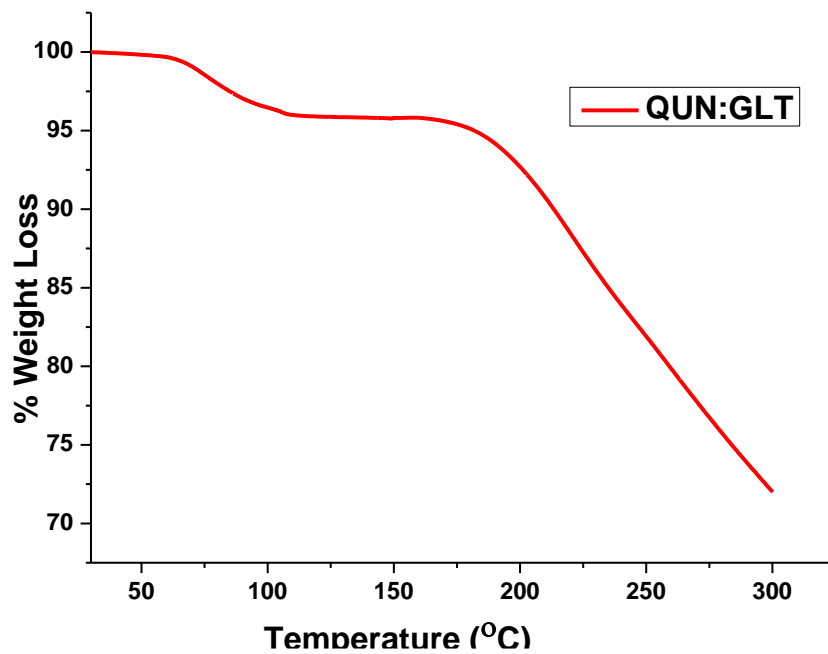

(b)

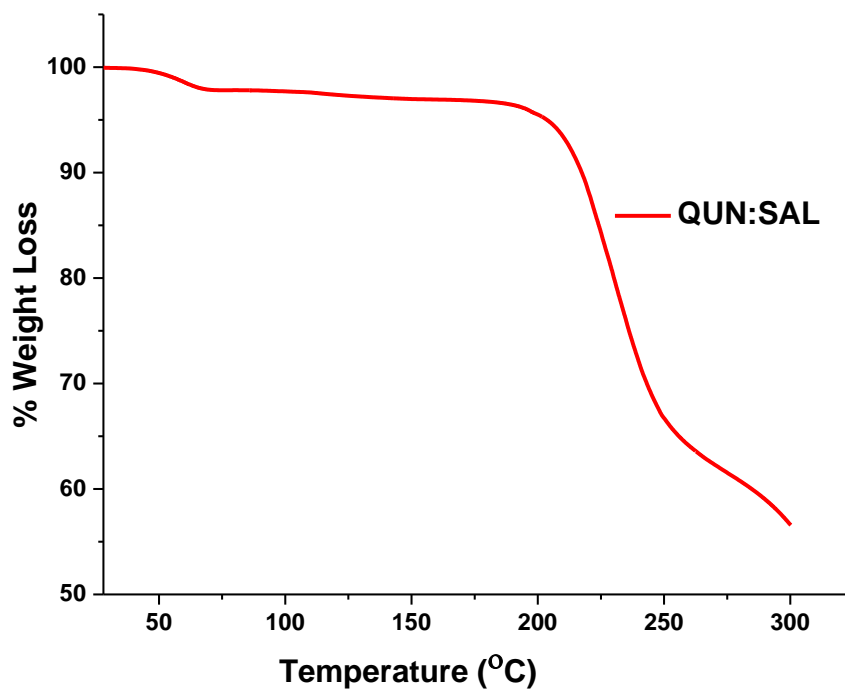

(c)

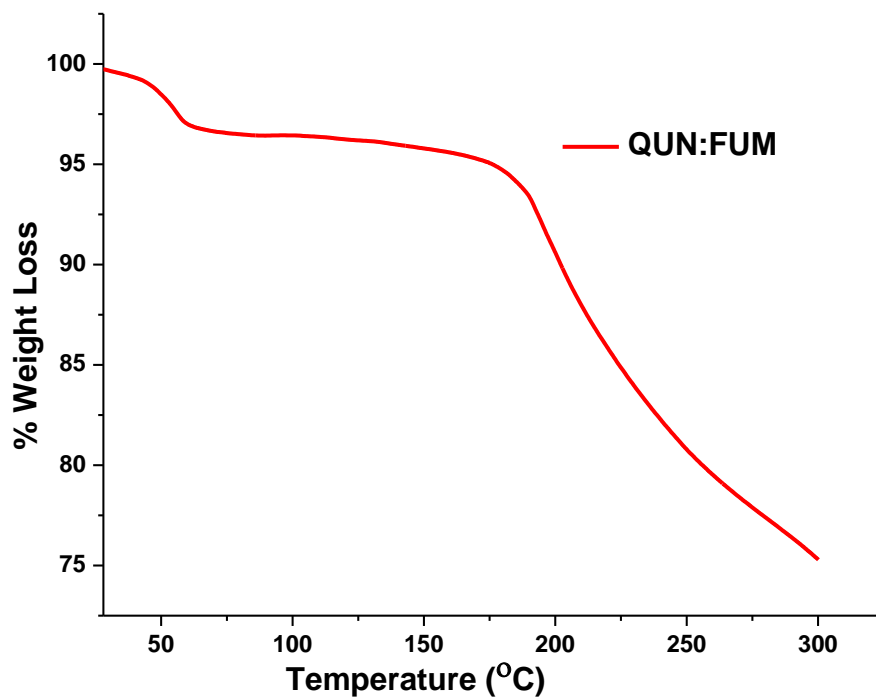

(d)

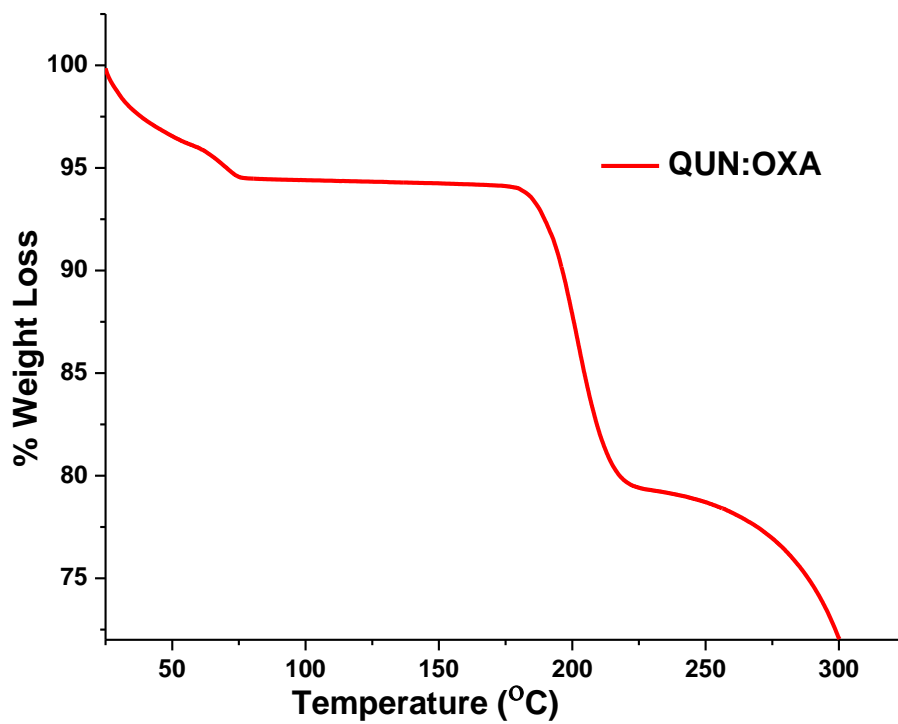

(e)

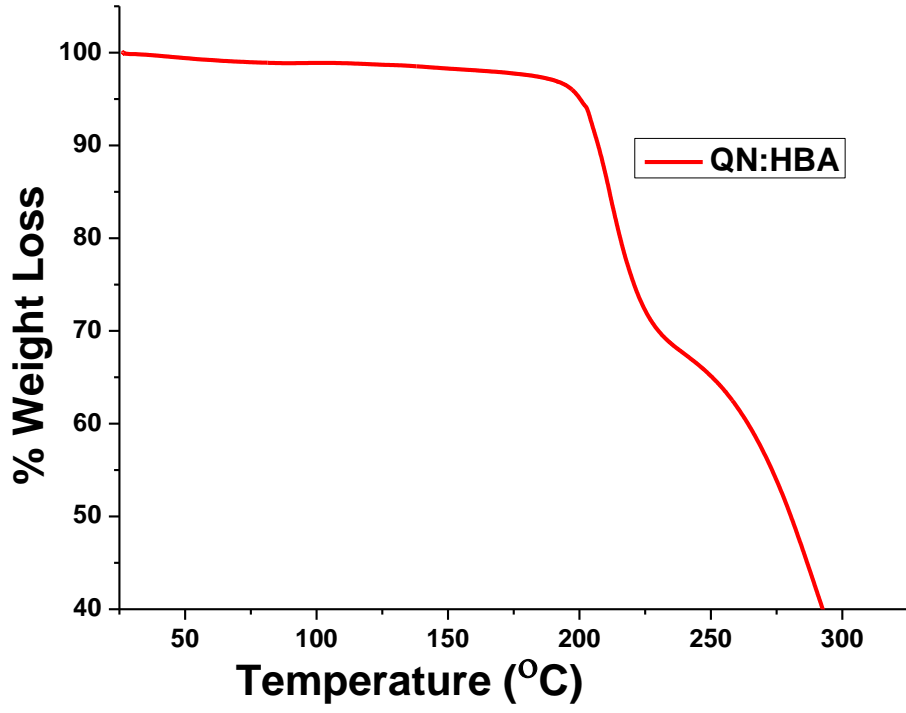

(f)

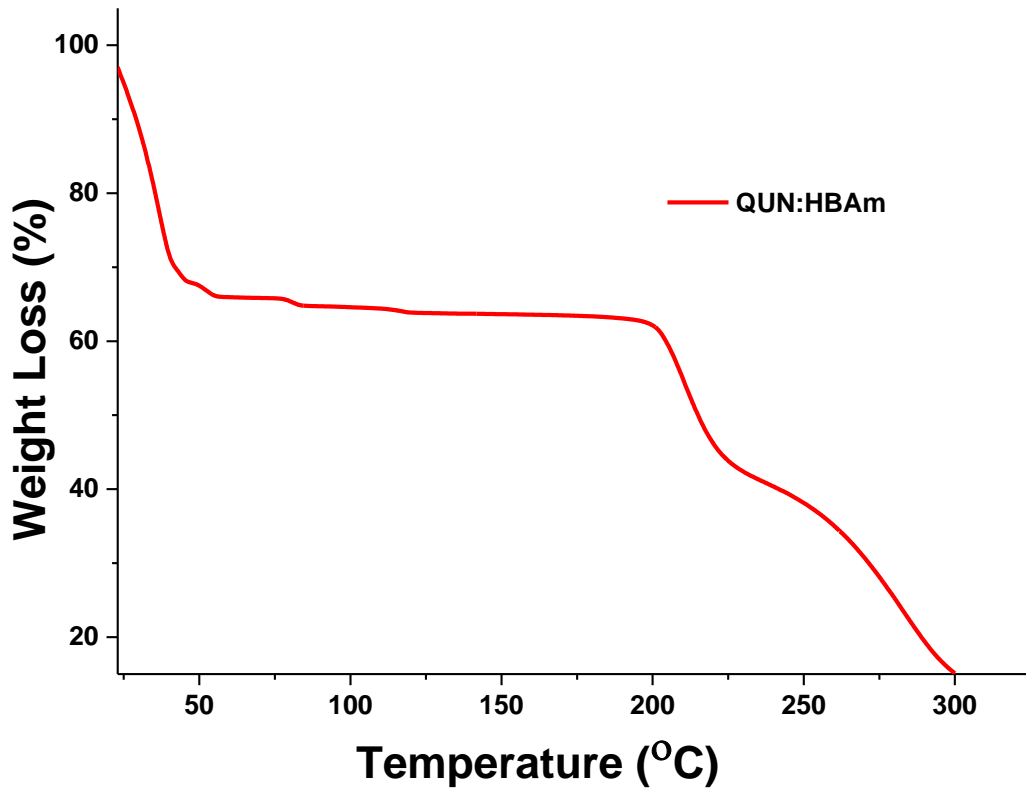

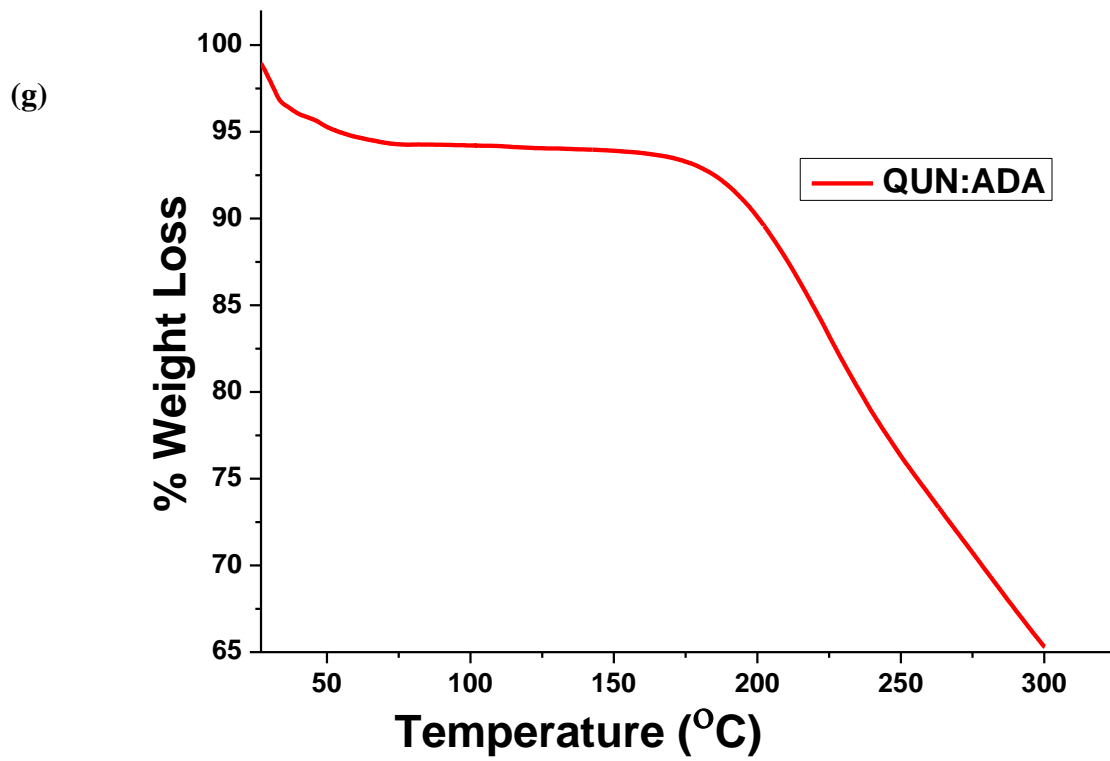

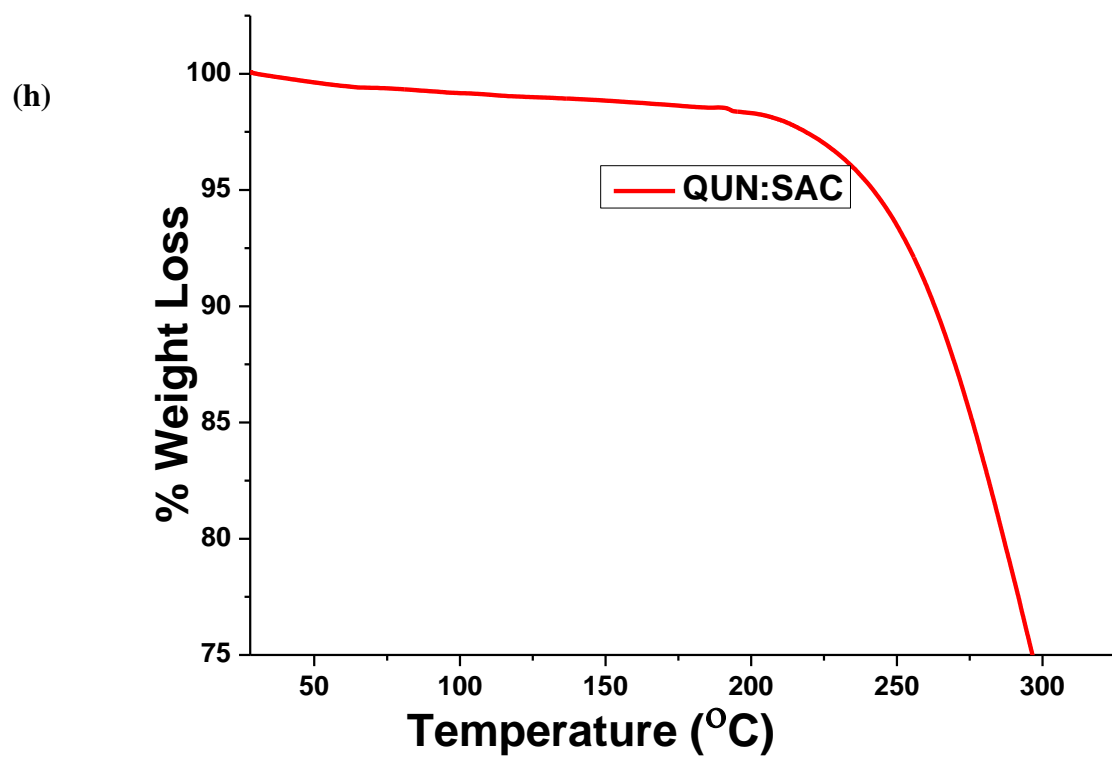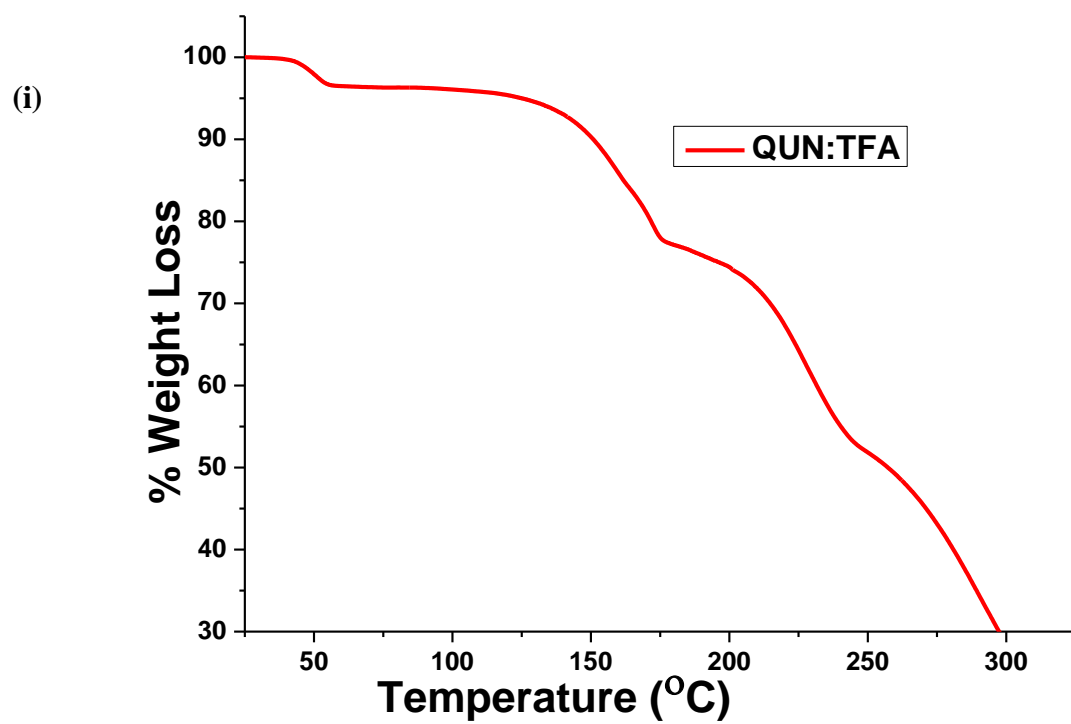

**Fig. S11.** The thermogram of the molecular complexes of QUN.



**Table S4.** Thermal induced % weight loss incurred in the complexes

| <b>Complex</b> | <b>Onset (°C)</b> | <b>Weight loss (%)</b> | <b>Inference</b> |
|----------------|-------------------|------------------------|------------------|
| QUN:GLT        | 60                | 4.1                    | 1 water          |
| QUN:SAL        | 39                | 2.2                    | 0.5 water        |
| QUN:ADA        | RT                | 5.9                    | 1.5 water        |
| QUN:FUM        | 38                | 4                      | 2 water          |
| QUN:OXA        | RT                | 6                      | 1.5 water        |
| QUN:TFA        | 35                | 3.5                    | 1 water          |
|                | 117               | 20                     | 1 TFA            |
| QUN: HBAm      | RT                |                        |                  |
| QUN:SAC        |                   |                        |                  |
| QUN:MAL        |                   |                        |                  |

**Table S5.** REFCODE corresponding to QUN and its hydrates/solvates

| <b>No.</b> | <b>REFCODE</b> | <b>Hydrate</b> | <b>Solvate</b> |
|------------|----------------|----------------|----------------|
| 1          | BOMDUC         | A              |                |
| 2          | BOMDUC01       | A              |                |
| 3          | ELIPAQ         | H              |                |
| 4          | JEYZIX         | H              |                |
| 5          | MUHZUM         |                | MeOH           |
| 6          | QUINDE         |                | EtOH           |
| 7          | QUINDE01       |                | EtOH           |
| 8          | SOYXUA         |                | MeOH           |

H = Hydrate; A = Anhydrous

**Table S6.** REFCODE corresponding to the complexes of QUN

| <b>Index</b> | <b>REFCODE</b> | <b>Hydrate</b> | <b>Solvate</b> | <b>Moiety</b> |
|--------------|----------------|----------------|----------------|---------------|
| 1            | TAKJUO         | H              |                | Carboxylate   |
| 2            | APAKIM         | A              |                | Carboxylate   |
| 3            | BEYTIJ         | A              |                | Carboxylate   |
| 4            | DOZLUC         | A              |                | Hydroxylate   |
| 5            | DOZMAJ         | A              |                | Hydroxylate   |
| 6            | ECAQAD         | A              |                | Acesulfame    |
| 7            | ECAQAD01       | A              |                | Acesulfame    |
| 8            | EJUKAV         |                | Acetone        | Carboxylate   |
| 9            | FABDAQ         |                | Acetone        | Other         |
| 10           | FEQZEG         | A              |                | Carboxylate   |
| 11           | FIJSUM         | H              |                | Carboxylate   |
| 12           | IGATOC         | A              |                | Carboxylate   |
| 13           | IROQEL         | H              |                | Carboxylate   |
| 14           | JIFYOM         | H              |                | Carboxylate   |
| 15           | KAMDAD         | H              |                | Toluene       |
| 16           | LIVWOC         | H              |                | Carboxylate   |
| 17           | MEKGUE         |                | EtOAc          | Carboxylate   |
| 18           | PUVTUV         | H              |                | Carboxylate   |
| 19           | ROHJAZ         | A              |                | Carboxylate   |
| 20           | ROHJAZ01       | A              |                | Carboxylate   |
| 21           | TIKBEX         | H              |                | Carboxylate   |
| 22           | TIKBIB         | H              |                | Carboxylate   |
| 23           | TIKBOH         | H              |                | Carboxylate   |
| 24           | TIKBUN         | H              |                | Carboxylate   |
| 25           | TUZCOI         | H              |                | Carboxylate   |
| 26           | TUZCUO         | H              |                | Carboxylate   |
| 27           | TUZDID         | H              |                | Carboxylate   |
| 28           | TUZDOJ         | A              |                | Carboxylate   |
| 29           | URIYAW         | H              |                | Carboxylate   |
| 30           | UYEZII         | A              |                | Carboxylate   |
| 31           | UYEZOO         | A              |                | Carboxylate   |
| 32           | UYEZOO01       | A              |                | Carboxylate   |
| 33           | UYIBAG         | A              |                | Carboxylate   |
| 34           | VAPLUV         | A              |                | Carboxylate   |
| 35           | VAZCUV         | A              |                | Carboxylate   |
| 36           | VIYROM         | H              |                | Carboxylate   |
| 37           | VUGSUL         |                | MeCN           | Carboxylate   |
| 38           | VUKROL         | H              |                | Carboxylate   |
| 39           | WANTOU         | H              |                | Carboxylate   |

|    |        |   |         |                |
|----|--------|---|---------|----------------|
| 40 | WEGTAF | H | Dioxane | Carboxyl       |
| 41 | XEGTAF | H |         | Cyclodextrin   |
| 42 | YAFHUL | H |         | Acesulfame     |
| 43 | YAFJAT | A |         | Acesulfame     |
| 44 | YAJHAV | A |         | Saccharin      |
| 45 | YANNIL | A |         | Saccharin      |
| 46 | YUYFUU | A |         | Methyl paraben |
| 47 | ZZZFHU | A |         | Benzene        |
| 48 | ZZZSQC | A |         | Benzene        |

H = Hydrate; A = Anhydrous

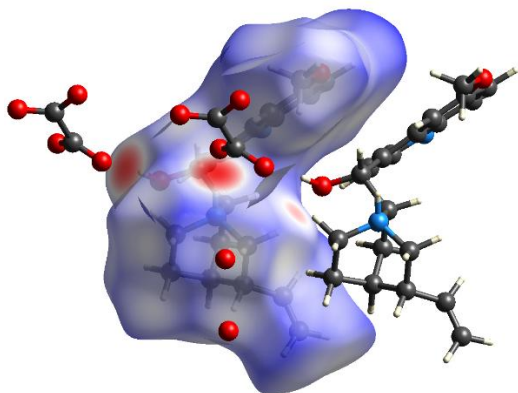

**QUN:OXA**

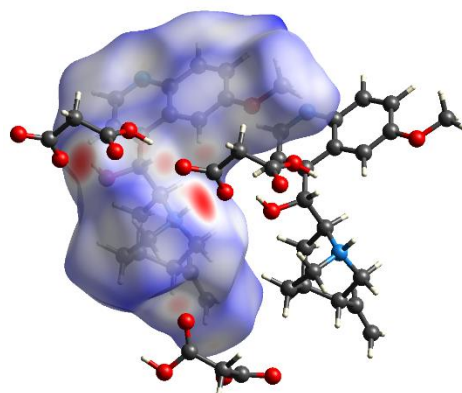

**QUN:MAL**

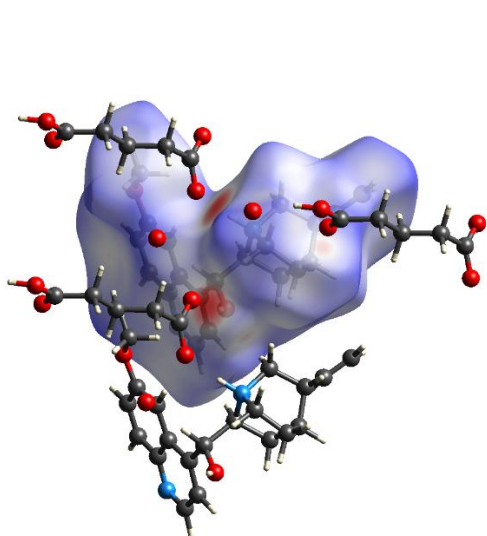

**QUN:GLT**

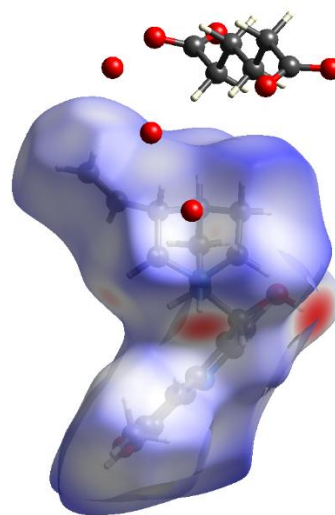

**QUN:ADA**

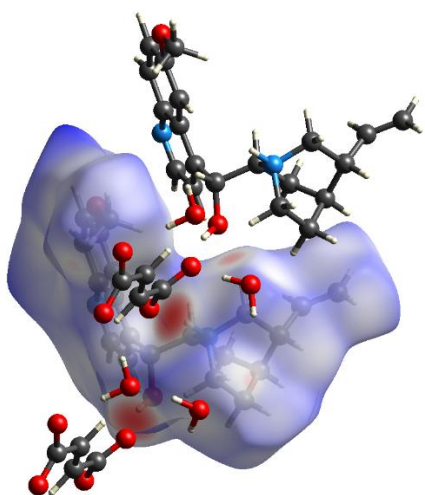

**QUN:FUM**

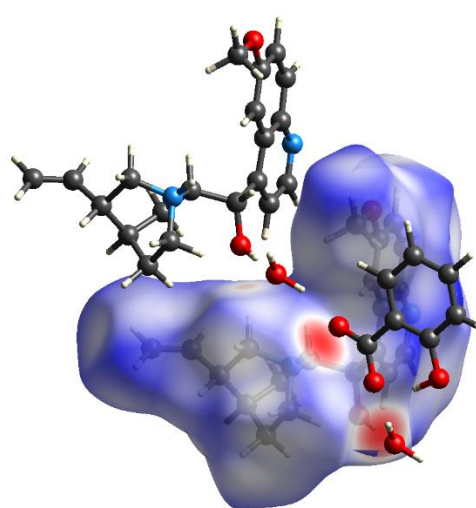

**QUN:SAL**

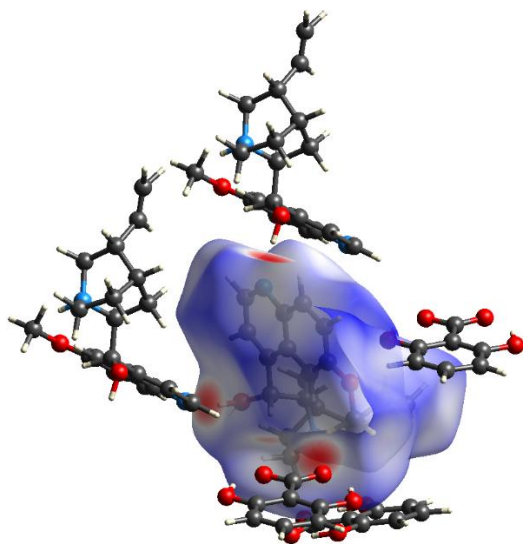

**QUN:DHB**

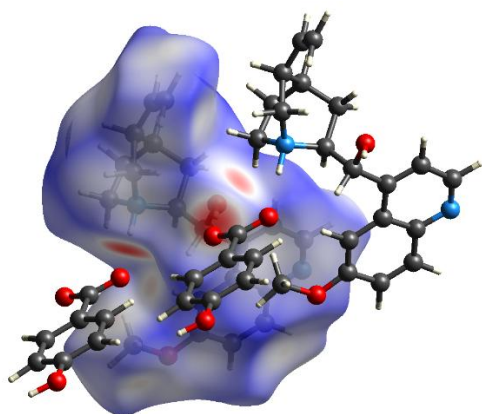

**QUN:HBAa**

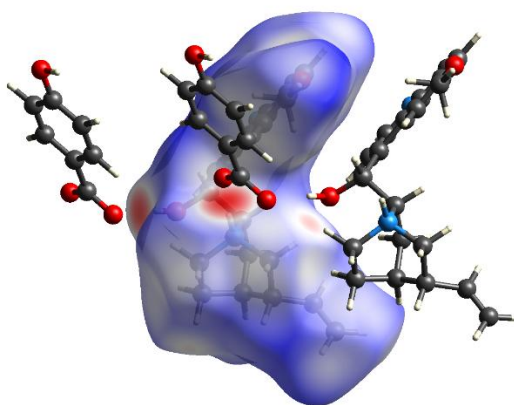

**QUN:HBAm**

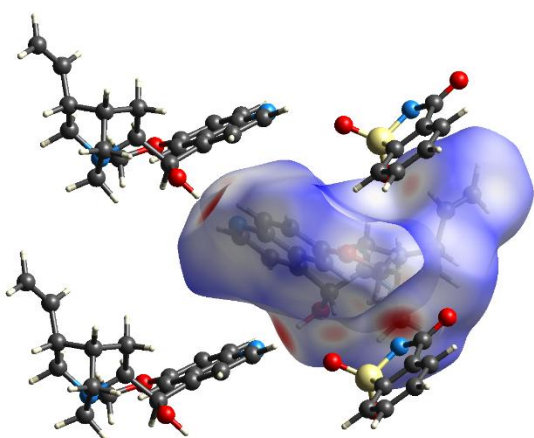

**QUN:SACa**

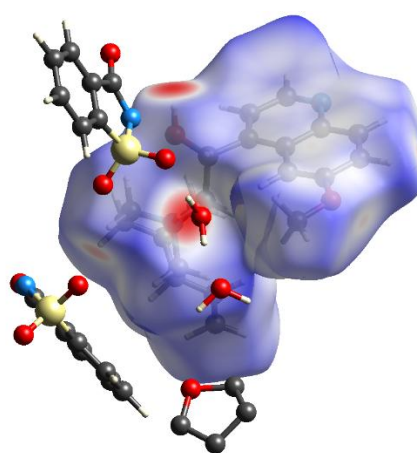

**QUN:SACH**

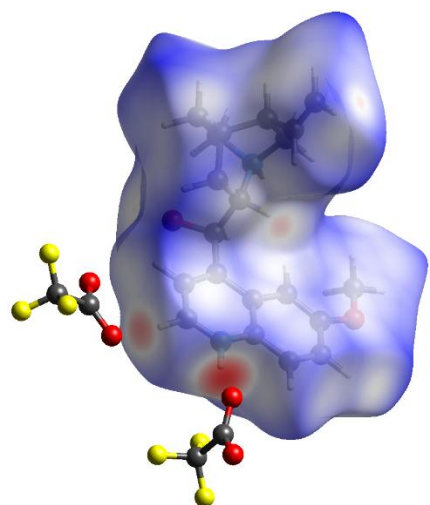

**QUN:TFA\_a**

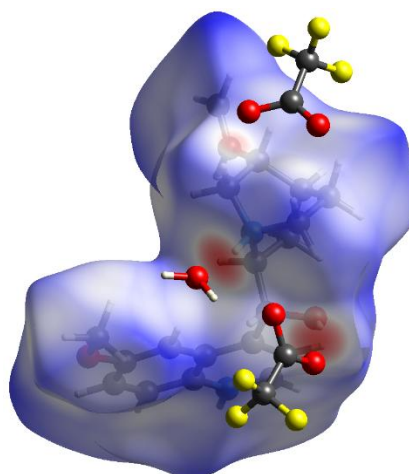

**QUN:TFA\_b**

**Fig. S12.** The  $d_{\text{norm}}$  surface map of QUN from the Hirshfeld surface (HS) analysis depicts short contacts in blue, van der Waals interactions in white, and hydrogen bonding in red surfaces.

## Solubility and dissolution studies

**Table S7.** The aqueous solubility calculated from the measured absorbance

QUN

**Solubility calculated from measured absorbance**

| Time | Absorbance | Con. (mg/ml)       |
|------|------------|--------------------|
| 5    | 0.072      | 0.03258683         |
| 10   | 0.108      | 0.048880246        |
| 15   | 0.12       | 0.054311384        |
| 20   | 0.147      | 0.066531445        |
| 30   | 0.183      | 0.08282486         |
| 45   | 0.192      | 0.086898214        |
| 60   | 0.225      | 0.101833845        |
| 120  | 0.297      | 0.134420675        |
| 180  | 0.375      | 0.169723075        |
| 360  | 0.444      | 0.200952121        |
| 600  | 0.522      | 0.23625452         |
| 1440 | 0.675      | <b>0.305501535</b> |

**Determined solubility and standard deviation**

| Time (min) | Exp 1           | Exp 2           | Exp 3           | STDEV    |
|------------|-----------------|-----------------|-----------------|----------|
| 5          | 0.038697        | 0.044807        | 0.032587        | 0.00611  |
| 10         | 0.055669        | 0.062458        | 0.04888         | 0.006789 |
| 15         | 0.062458        | 0.070605        | 0.054311        | 0.008147 |
| 20         | 0.077394        | 0.088256        | 0.066531        | 0.010862 |
| 30         | 0.089614        | 0.096403        | 0.082825        | 0.006789 |
| 45         | 0.105228        | 0.123558        | 0.086898        | 0.01833  |
| 60         | 0.116769        | 0.131705        | 0.101834        | 0.014936 |
| 120        | 0.154787        | 0.175154        | 0.134421        | 0.020367 |
| 180        | 0.189411        | 0.209099        | 0.169723        | 0.019688 |
| 360        | 0.217246        | 0.233539        | 0.200952        | 0.016293 |
| 600        | 0.243722        | 0.25119         | 0.236255        | 0.007468 |
| 1440       | <b>0.300749</b> | <b>0.295997</b> | <b>0.305502</b> | 0.004752 |

## QUN:OXA

### Solubility calculated from measured absorbance

| Time | Absorbance | Con. (mg/ml)       |
|------|------------|--------------------|
| 5    | 0.675      | 0.305501535        |
| 10   | 0.831      | 0.376106334        |
| 15   | 0.954      | 0.431775502        |
| 20   | 1.137      | 0.514600363        |
| 30   | 1.293      | 0.585205162        |
| 45   | 1.602      | 0.725056975        |
| 60   | 2.001      | 0.905642327        |
| 120  | 2.157      | 0.976247126        |
| 180  | 2.589      | 1.171768108        |
| 360  | 3.081      | 1.394444782        |
| 600  | 3.885      | 1.758331055        |
| 1440 | 4.533      | <b>2.051612528</b> |

### Determined solubility and standard deviation

| Time (min) | Exp 1           | Exp 2           | Exp 3           | STDEV    |
|------------|-----------------|-----------------|-----------------|----------|
| 5          | 0.443996        | 0.58249         | 0.305502        | 0.138494 |
| 10         | 0.539719        | 0.703332        | 0.376106        | 0.163613 |
| 15         | 0.586563        | 0.74135         | 0.431776        | 0.154787 |
| 20         | 0.647663        | 0.780726        | 0.5146          | 0.133063 |
| 30         | 0.709442        | 0.83368         | 0.585205        | 0.124237 |
| 45         | 0.818065        | 0.911073        | 0.725057        | 0.093008 |
| 60         | 0.93144         | 0.957238        | 0.905642        | 0.025798 |
| 120        | 1.071292        | 1.166337        | 0.976247        | 0.095045 |
| 180        | 1.28107         | 1.390371        | 1.171768        | 0.109302 |
| 360        | 1.596755        | 1.799065        | 1.394445        | 0.20231  |
| 600        | 1.809927        | 1.861523        | 1.758331        | 0.051596 |
| 1440       | <b>2.002732</b> | <b>1.953852</b> | <b>2.051613</b> | 0.04888  |



## QUN:FUM

### Solubility calculated from measured absorbance

| Time | Absorbance | Con. (mg/ml)       |
|------|------------|--------------------|
| 5    | 0.456      | 0.206383259        |
| 10   | 0.783      | 0.35438178         |
| 15   | 0.957      | 0.433133287        |
| 20   | 1.35       | 0.611003069        |
| 30   | 1.59       | 0.719625837        |
| 45   | 1.68       | 0.760359375        |
| 60   | 1.854      | 0.839110882        |
| 120  | 2.748      | 1.243730692        |
| 180  | 3.318      | 1.501709766        |
| 360  | 4.302      | 1.947063114        |
| 600  | 5.109      | 2.312307171        |
| 1440 | 5.241      | <b>2.372049693</b> |

### Determined solubility and standard deviation

|      | Exp 1           | Exp 2          | Exp 3           | STDEV    |
|------|-----------------|----------------|-----------------|----------|
| 5    | 0.215888        | 0.206383       | 0.225392        | 0.009504 |
| 10   | 0.34963         | 0.354382       | 0.344877        | 0.004752 |
| 15   | 0.437886        | 0.433133       | 0.442638        | 0.004752 |
| 20   | 0.556692        | 0.611003       | 0.50238         | 0.054311 |
| 30   | 0.685002        | 0.719626       | 0.650379        | 0.034624 |
| 45   | 0.730488        | 0.760359       | 0.700617        | 0.029871 |
| 60   | 0.811955        | 0.839111       | 0.784799        | 0.027156 |
| 120  | 1.056356        | 1.243731       | 0.868982        | 0.187374 |
| 180  | 1.283785        | 1.50171        | 1.065861        | 0.217924 |
| 360  | 1.600828        | 1.947063       | 1.254593        | 0.346235 |
| 600  | 2.069943        | 2.312307       | 1.827578        | 0.242365 |
| 1440 | <b>2.406673</b> | <b>2.37205</b> | <b>2.441297</b> | 0.034624 |

QUN:SUC

**Solubility calculated from measured absorbance**

| Time | Absorbance | Con. (mg/ml)       |
|------|------------|--------------------|
| 5    | 0.831      | 0.376106334        |
| 10   | 1.23       | 0.556691685        |
| 15   | 1.602      | 0.725056975        |
| 20   | 1.818      | 0.822817467        |
| 30   | 1.878      | 0.849973158        |
| 45   | 2.157      | 0.976247126        |
| 60   | 2.718      | 1.230152846        |
| 120  | 2.898      | 1.311619922        |
| 180  | 3.822      | 1.729817578        |
| 360  | 4.779      | 2.162950865        |
| 600  | 4.995      | 2.260711356        |
| 1440 | 5.181      | <b>2.344894001</b> |

**Determined solubility and standard deviation**

|      | Exp 1           | Exp 2           | Exp 3           | STDEV    |
|------|-----------------|-----------------|-----------------|----------|
| 5    | 0.405299        | 0.434491        | 0.376106        | 0.029192 |
| 10   | 0.633407        | 0.710121        | 0.556692        | 0.076715 |
| 15   | 0.813313        | 0.901569        | 0.725057        | 0.088256 |
| 20   | 0.898175        | 0.973532        | 0.822817        | 0.075357 |
| 30   | 1.07265         | 1.295327        | 0.849973        | 0.222677 |
| 45   | 1.273602        | 1.570957        | 0.976247        | 0.297355 |
| 60   | 1.508499        | 1.786845        | 1.230153        | 0.278346 |
| 120  | 1.662607        | 2.013595        | 1.31162         | 0.350987 |
| 180  | 1.925339        | 2.12086         | 1.729818        | 0.195521 |
| 360  | 2.2675          | 2.37205         | 2.162951        | 0.104549 |
| 600  | 2.338105        | 2.415499        | 2.260711        | 0.077394 |
| 1440 | <b>2.416857</b> | <b>2.488819</b> | <b>2.344894</b> | 0.071963 |

**QUN:ADA****Solubility calculated from measured absorbance**

| Time | Absorbance | Con. (mg/ml)       |
|------|------------|--------------------|
| 5    | 0.366      | 0.165649721        |
| 10   | 0.675      | 0.305501535        |
| 15   | 0.831      | 0.376106334        |
| 20   | 1.014      | 0.458931194        |
| 30   | 1.293      | 0.585205162        |
| 45   | 1.446      | 0.654452176        |
| 60   | 1.539      | 0.696543499        |
| 120  | 1.941      | 0.878486635        |
| 180  | 2.712      | 1.227437277        |
| 360  | 3.699      | 1.67414841         |
| 600  | 4.068      | 1.841155915        |
| 1440 | 4.131      | <b>1.869669392</b> |

**Determined solubility and standard deviation**

|      | Exp 1           | Exp 2           | Exp 3           | STDEV    |
|------|-----------------|-----------------|-----------------|----------|
| 5    | 0.196879        | 0.228108        | 0.16565         | 0.031229 |
| 10   | 0.314327        | 0.323153        | 0.305502        | 0.008826 |
| 15   | 0.397152        | 0.418198        | 0.376106        | 0.021046 |
| 20   | 0.460289        | 0.461647        | 0.458931        | 0.001358 |
| 30   | 0.575701        | 0.566196        | 0.585205        | 0.009504 |
| 45   | 0.689755        | 0.725057        | 0.654452        | 0.035302 |
| 60   | 0.752892        | 0.80924         | 0.696543        | 0.056348 |
| 120  | 0.991862        | 1.105237        | 0.878487        | 0.113375 |
| 180  | 1.255951        | 1.284464        | 1.227437        | 0.028513 |
| 360  | 1.680258        | 1.686368        | 1.674148        | 0.00611  |
| 600  | 1.801101        | 1.761047        | 1.841156        | 0.040055 |
| 1440 | <b>1.873743</b> | <b>1.877816</b> | <b>1.869669</b> | 0.004073 |

**QUN:MAL**

**Solubility calculated from measured absorbance**

| <b>Time</b> | <b>Absorbance</b> | <b>Con. (mg/ml)</b> |
|-------------|-------------------|---------------------|
| 5           | 0.738             | 0.334015011         |
| 10          | 1.047             | 0.473866825         |
| 15          | 1.416             | 0.64087433          |
| 20          | 1.755             | 0.79430399          |
| 30          | 2.157             | 0.976247126         |
| 45          | 2.682             | 1.213859431         |
| 60          | 3.051             | 1.380866936         |
| 120         | 4.533             | 2.051612528         |
| 180         | 5.889             | 2.665331166         |
| 360         | 7.371             | 3.336076758         |
| 600         | 7.554             | 3.418901618         |
| 1440        | 7.77              | <b>3.516662109</b>  |

**Determined solubility and standard deviation**

|      | <b>Exp 1</b>    | <b>Exp 2</b>    | <b>Exp 3</b>    | <b>STDEV</b> |
|------|-----------------|-----------------|-----------------|--------------|
| 5    | 0.347593        | 0.361171        | 0.334015        | 0.013578     |
| 10   | 0.499665        | 0.525463        | 0.473867        | 0.025798     |
| 15   | 0.671424        | 0.701975        | 0.640874        | 0.03055      |
| 20   | 0.85812         | 0.921936        | 0.794304        | 0.063816     |
| 30   | 1.091659        | 1.207071        | 0.976247        | 0.115412     |
| 45   | 1.364574        | 1.515288        | 1.213859        | 0.150714     |
| 60   | 1.536333        | 1.6918          | 1.380867        | 0.155466     |
| 120  | 2.173813        | 2.296014        | 2.051613        | 0.122201     |
| 180  | 2.666689        | 2.668047        | 2.665331        | 0.001358     |
| 360  | 3.207766        | 3.079455        | 3.336077        | 0.128311     |
| 600  | 3.428406        | 3.437911        | 3.418902        | 0.009504     |
| 1440 | <b>3.531598</b> | <b>3.546533</b> | <b>3.516662</b> | 0.014936     |

**QUN:GLT****Solubility calculated from measured absorbance**

| <b>Time</b> | <b>Absorbance</b> | <b>Con. (mg/ml)</b> |
|-------------|-------------------|---------------------|
| 5           | 0.564             | 0.255263504         |
| 10          | 0.87              | 0.393757533         |
| 15          | 1.002             | 0.453500056         |
| 20          | 1.242             | 0.562122824         |
| 30          | 1.284             | 0.581131808         |
| 45          | 2.049             | 0.927366881         |
| 60          | 2.442             | 1.105236663         |
| 120         | 3.426             | 1.550590011         |
| 180         | 3.951             | 1.788202316         |
| 360         | 4.017             | 1.818073577         |
| 600         | 4.236             | 1.917191853         |
| 1440        | 4.344             | <b>1.966072098</b>  |

**Determined solubility and standard deviation**

|      | <b>Exp 1</b>    | <b>Exp 2</b>   | <b>Exp 3</b>    | <b>STDEV</b> |
|------|-----------------|----------------|-----------------|--------------|
| 5    | 0.286493        | 0.317722       | 0.255264        | 0.031229     |
| 10   | 0.429739        | 0.46572        | 0.393758        | 0.035981     |
| 15   | 0.513243        | 0.572985       | 0.4535          | 0.059743     |
| 20   | 0.621186        | 0.68025        | 0.562123        | 0.059064     |
| 30   | 0.711479        | 0.841826       | 0.581132        | 0.130347     |
| 45   | 1.019017        | 1.110668       | 0.927367        | 0.09165      |
| 60   | 1.162264        | 1.219291       | 1.105237        | 0.057027     |
| 120  | 1.633415        | 1.71624        | 1.55059         | 0.082825     |
| 180  | 1.879853        | 1.971503       | 1.788202        | 0.09165      |
| 360  | 1.913797        | 2.009521       | 1.818074        | 0.095724     |
| 600  | 1.966751        | 2.01631        | 1.917192        | 0.049559     |
| 1440 | <b>2.009521</b> | <b>2.05297</b> | <b>1.966072</b> | 0.043449     |

**QUN:MAE**

**Solubility calculated from measured absorbance**

| <b>Time</b> | <b>Absorbance</b> | <b>Con. (mg/ml)</b> |
|-------------|-------------------|---------------------|
| 5           | 0.543             | 0.245759012         |
| 10          | 0.696             | 0.315006027         |
| 15          | 0.849             | 0.384253041         |
| 20          | 1.023             | 0.463004548         |
| 30          | 1.284             | 0.581131808         |
| 45          | 1.635             | 0.739992606         |
| 60          | 1.854             | 0.839110882         |
| 120         | 3.318             | 1.501709766         |
| 180         | 3.951             | 1.788202316         |
| 360         | 4.149             | 1.877816099         |
| 600         | 4.389             | 1.986438867         |
| 1440        | 4.848             | <b>2.194179911</b>  |

**Determined solubility and standard deviation**

|      | <b>Exp 1</b>    | <b>Exp 2</b>    | <b>Exp 3</b>   | <b>STDEV</b> |
|------|-----------------|-----------------|----------------|--------------|
| 5    | 0.247796        | 0.249832        | 0.245759       | 0.002037     |
| 10   | 0.329942        | 0.344877        | 0.315006       | 0.014936     |
| 15   | 0.431776        | 0.479298        | 0.384253       | 0.047522     |
| 20   | 0.524784        | 0.586563        | 0.463005       | 0.061779     |
| 30   | 0.671424        | 0.761717        | 0.581132       | 0.090293     |
| 45   | 0.797698        | 0.855404        | 0.739993       | 0.057706     |
| 60   | 1.080118        | 1.321124        | 0.839111       | 0.241007     |
| 120  | 1.50782         | 1.51393         | 1.50171        | 0.00611      |
| 180  | 1.812642        | 1.837083        | 1.788202       | 0.02444      |
| 360  | 1.998659        | 2.119502        | 1.877816       | 0.120843     |
| 600  | 2.067227        | 2.148015        | 1.986439       | 0.080788     |
| 1440 | <b>2.211152</b> | <b>2.228125</b> | <b>2.19418</b> | 0.016972     |

**QUN:BZA****Solubility calculated from measured absorbance**

| <b>Time</b> | <b>Absorbance</b> | <b>Con. (mg/ml)</b> |
|-------------|-------------------|---------------------|
| 5           | 0.783             | 0.35438178          |
| 10          | 0.957             | 0.433133287         |
| 15          | 1.002             | 0.453500056         |
| 20          | 1.11              | 0.502380301         |
| 30          | 1.242             | 0.562122824         |
| 45          | 1.35              | 0.611003069         |
| 60          | 1.656             | 0.749497098         |
| 120         | 2.007             | 0.908357896         |
| 180         | 2.136             | 0.966742634         |
| 360         | 2.532             | 1.145970201         |
| 600         | 2.727             | 1.2342262           |
| 1440        | 3.252             | <b>1.471838504</b>  |

**Determined solubility and standard deviation**

|      | <b>Exp 1</b>    | <b>Exp 2</b>    | <b>Exp 3</b>    | <b>STDEV</b> |
|------|-----------------|-----------------|-----------------|--------------|
| 5    | 0.372033        | 0.389684        | 0.354382        | 0.017651     |
| 10   | 0.44128         | 0.449427        | 0.433133        | 0.008147     |
| 15   | 0.479977        | 0.506454        | 0.4535          | 0.026477     |
| 20   | 0.53293         | 0.563481        | 0.50238         | 0.03055      |
| 30   | 0.591315        | 0.620508        | 0.562123        | 0.029192     |
| 45   | 0.644948        | 0.678892        | 0.611003        | 0.033945     |
| 60   | 0.799735        | 0.849973        | 0.749497        | 0.050238     |
| 120  | 0.986431        | 1.064503        | 0.908358        | 0.078073     |
| 180  | 1.02988         | 1.093017        | 0.966743        | 0.063137     |
| 360  | 1.226758        | 1.307547        | 1.14597         | 0.080788     |
| 600  | 1.321124        | 1.408023        | 1.234226        | 0.086898     |
| 1440 | <b>1.482701</b> | <b>1.493563</b> | <b>1.471839</b> | 0.010862     |

## QUN-SO<sub>4</sub>

**Solubility calculated from measured absorbance**

| Time | Absorbance | Con. (mg/ml)       |
|------|------------|--------------------|
| 5    | 0.831      | 0.462274157        |
| 10   | 1.24       | 0.689795373        |
| 15   | 1.648      | 0.916760302        |
| 20   | 1.625      | 0.903965711        |
| 30   | 1.912      | 1.063619962        |
| 45   | 2.144      | 1.192678452        |
| 60   | 2.282      | 1.269446001        |
| 120  | 2.346      | 1.305048343        |
| 180  | 2.706      | 1.505311516        |
| 360  | 2.812      | 1.564277895        |
| 600  | 2.832      | 1.575403626        |
| 1440 | 2.964      | <b>1.648833456</b> |

**Determined solubility and standard deviation**

|      | Exp 1          | Exp 2           | Exp 3           | STDEV    |
|------|----------------|-----------------|-----------------|----------|
| 5    | 0.468671       | 0.475069        | 0.462274        | 0.006397 |
| 10   | 0.692855       | 0.695915        | 0.689795        | 0.00306  |
| 15   | 0.895065       | 0.87337         | 0.91676         | 0.021695 |
| 20   | 0.907303       | 0.910641        | 0.903966        | 0.003338 |
| 30   | 1.045263       | 1.026905        | 1.06362         | 0.018357 |
| 45   | 1.171261       | 1.149844        | 1.192678        | 0.021417 |
| 60   | 1.299485       | 1.329525        | 1.269446        | 0.030039 |
| 120  | 1.397948       | 1.490848        | 1.305048        | 0.0929   |
| 180  | 1.5131         | 1.520888        | 1.505312        | 0.007788 |
| 360  | 1.579298       | 1.594317        | 1.564278        | 0.01502  |
| 600  | 1.59988        | 1.624357        | 1.575404        | 0.024477 |
| 1440 | <b>1.67331</b> | <b>1.697787</b> | <b>1.648833</b> | 0.024477 |



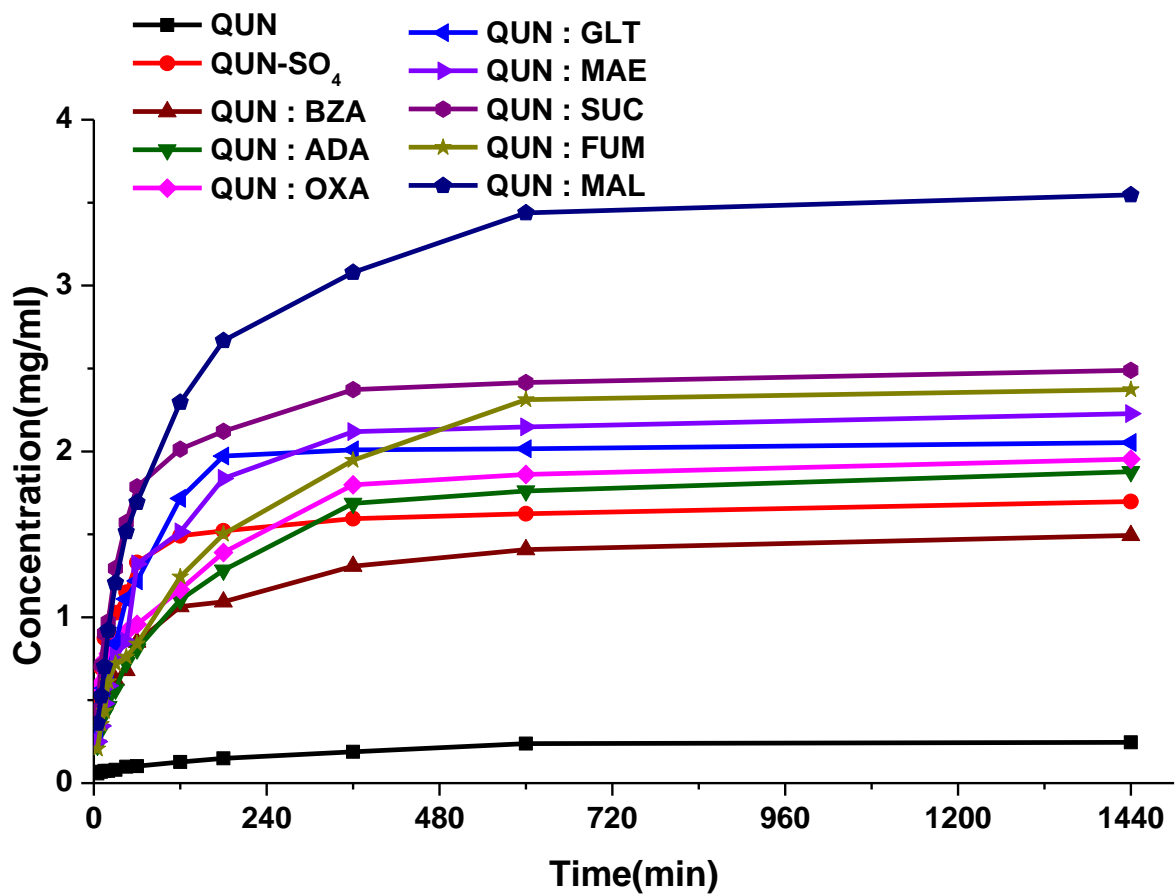

Fig. S13 The experimentally determined solubility curve till 24 hours (1440 minutes)

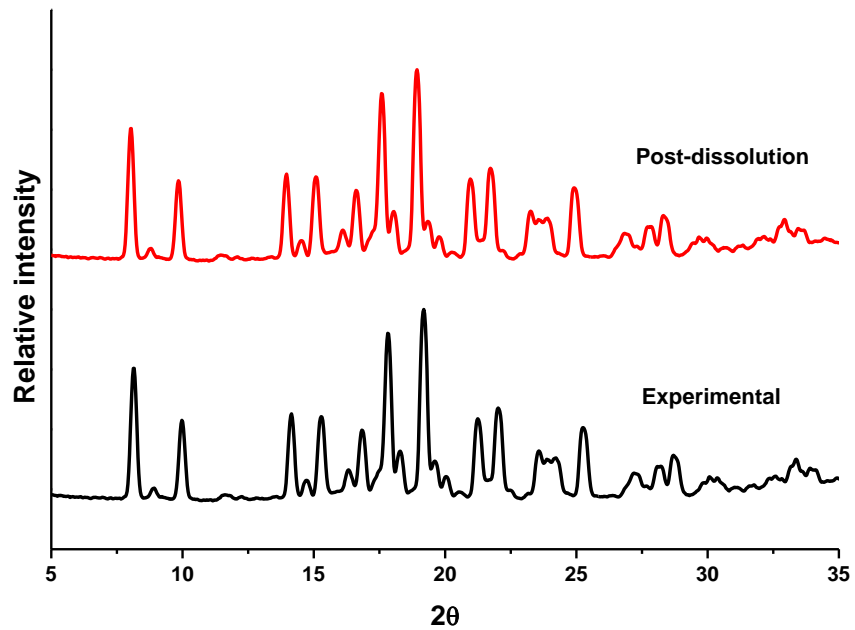

QUN:SUC

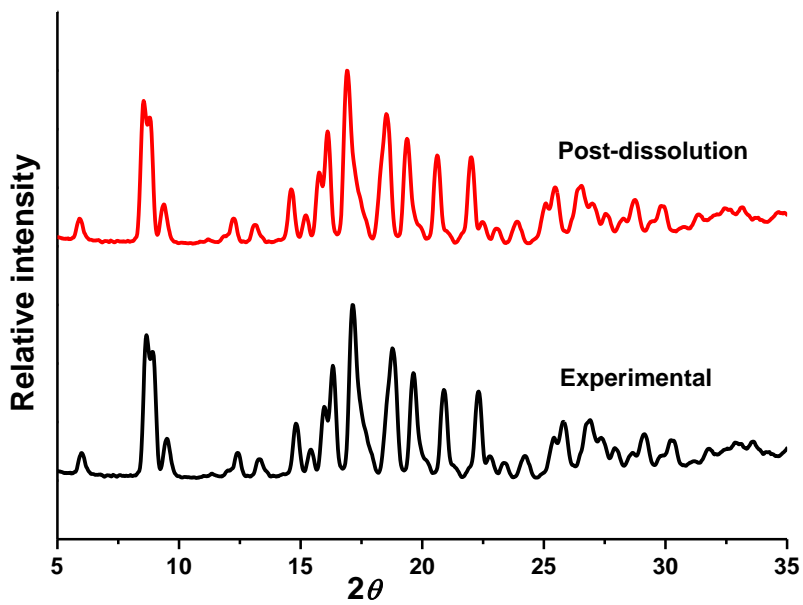

QUN:OXA

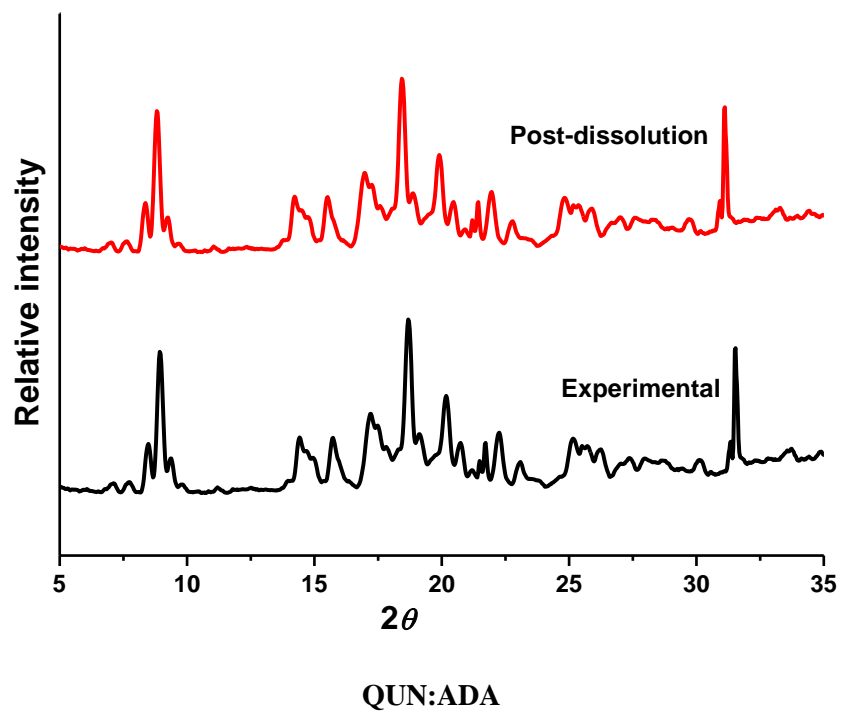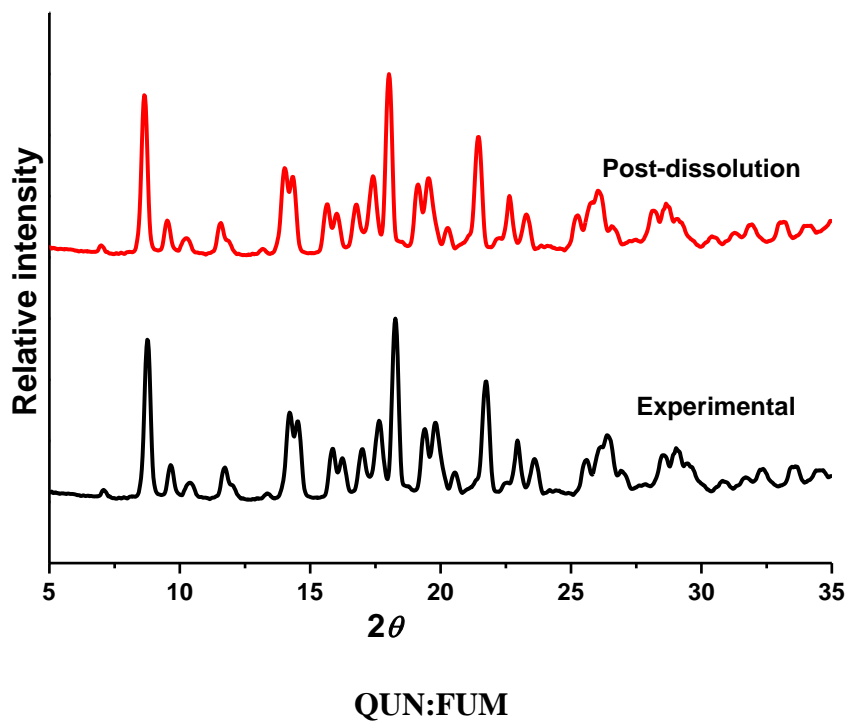

**Fig. S14** PXRd patterns of the solid materials after the dissolution experiment to confirm the phase stability
